# Supplementary material for: Construction of the axolotl cell landscape using combinatorial hybridization sequencing at single-cell resolution
Source: PubMed Central journal article supplement (PMC9307617; doi:10.1038/s41467-022-31879-z), 2022-07-22
Supplement: 41467_2022_31879_MOESM3_ESM.pdf [file 41467_2022_31879_MOESM3_ESM.pdf]

## **Description of Additional Supplementary Files**

Supplementary\_Dataset\_1: CH-seq\_oligos

Supplementary\_Dataset\_2: RNA\_Reads\_Genes\_in\_Fig. 1c

Supplementary\_Dataset\_3: Axolotl\_cell\_landscape\_Celltype\_Annotation

Supplementary\_Dataset\_4: RNA\_in\_situ\_hybridization\_probes

Supplementary\_Dataset\_5: Differentially\_expressed\_genes\_in\_parenchyma\_cells

Supplementary\_Dataset\_6: Generegulatorynetworks\_parameters\_of\_NodesGenes
