# Supplementary material for: Construction of the axolotl cell landscape using combinatorial hybridization sequencing at single-cell resolution
Source: Nat Commun. 2022 Jul 22;13:4228. doi: 10.1038/s41467-022-31879-z (PMC9307617; doi:10.1038/s41467-022-31879-z)
Supplement: Supplementary file 8 — Supplementary Dataset 5 [file 41467_2022_31879_MOESM8_ESM.xlsx]

## Sheet: DEGs_Endothelial_cells
META:Metamorphosed axolotl; WT: Neotenic axolotl
	p_val	avg_log2FC	pct.1	pct.2	p_val_adj	cluster	gene
AMEXTC-0340000044071-FBN1	0	0.789011	0.432	0.268	0	META	AMEXTC-0340000044071-FBN1
AMEXTC-0340000049825-dcn	0	0.722755	0.584	0.407	0	META	AMEXTC-0340000049825-dcn
AMEXTC-0340000171041-LOC108708207	0	0.704198	0.153	0.03	0	META	AMEXTC-0340000171041-LOC108708207
AMEXTC-0340000279815-hypothetical	0	0.680746	0.728	0.814	0	META	AMEXTC-0340000279815-hypothetical
AMEXTC-0340000051589-COL11A1	0	0.489032	0.211	0.069	0	META	AMEXTC-0340000051589-COL11A1
AMEXTC-0340000197936-atp1a1.L	0	0.433932	0.132	0.047	0	META	AMEXTC-0340000197936-atp1a1.L
AMEXTC-0340000051609-CALB1	0	0.415408	0.076	0.002	0	META	AMEXTC-0340000051609-CALB1
AMEXTC-0340000063401-thrombospondin-4	0	0.402415	0.121	0.027	0	META	AMEXTC-0340000063401-thrombospondin-4
AMEXTC-0340000019271-LOC106674670	0	0.385806	0.347	0.203	0	META	AMEXTC-0340000019271-LOC106674670
AMEXTC-0340000016624-Angiogenin-2	0	0.371827	0.073	0	0	META	AMEXTC-0340000016624-Angiogenin-2
AMEXTC-0340000273753-ndrg1	0	0.354154	0.125	0.02	0	META	AMEXTC-0340000273753-ndrg1
AMEXTC-0340000024582-C1QTNF1	0	0.341791	0.153	0.026	0	META	AMEXTC-0340000024582-C1QTNF1
AMEXTC-0340000019121-tgfbi	0	0.33662	0.175	0.073	0	META	AMEXTC-0340000019121-tgfbi
AMEXTC-0340000002378-LOC108700220	0	0.324062	0.133	0.027	0	META	AMEXTC-0340000002378-LOC108700220
AMEXTC-0340000019594-atp1a1.L	0	0.3145	0.19	0.084	0	META	AMEXTC-0340000019594-atp1a1.L
AMEXTC-0340000028187-LOC110090180	0	0.282141	0.247	0.111	0	META	AMEXTC-0340000028187-LOC110090180
AMEXTC-0340000024264-chka.L	0	0.27932	0.135	0.041	0	META	AMEXTC-0340000024264-chka.L
AMEXTC-0340000010712-LSU	0	0.273806	0.148	0.064	0	META	AMEXTC-0340000010712-LSU
AMEXTC-0340000020700-SLC4A4	0	0.269362	0.056	0.005	0	META	AMEXTC-0340000020700-SLC4A4
AMEXTC-0340000059460-rhcg.L	0	0.244037	0.078	0.003	0	META	AMEXTC-0340000059460-rhcg.L
AMEXTC-0340000071836-beta-globin	0	0.226669	0.081	0.022	0	META	AMEXTC-0340000071836-beta-globin
AMEXTC-0340000084578-LOC106605384	0	0.224138	0.076	0.008	0	META	AMEXTC-0340000084578-LOC106605384
AMEXTC-0340000035688-LOC108696199	0	0.221637	0.076	0.002	0	META	AMEXTC-0340000035688-LOC108696199
AMEXTC-0340000149168-NDRG2	0	0.221367	0.174	0.062	0	META	AMEXTC-0340000149168-NDRG2
AMEXTC-0340000057775-FHL1	0	0.212762	0.196	0.091	0	META	AMEXTC-0340000057775-FHL1
AMEXTC-0340000042648-aspn.L	0	0.204588	0.097	0.022	0	META	AMEXTC-0340000042648-aspn.L
AMEXTC-0340000053511-LOC108788923	0	0.191192	0.08	0.005	0	META	AMEXTC-0340000053511-LOC108788923
AMEXTC-0340000060397-ABI3BP	0	0.188079	0.119	0.046	0	META	AMEXTC-0340000060397-ABI3BP
AMEXTC-0340000025182-LOC108786473	0	0.179552	0.052	0.006	0	META	AMEXTC-0340000025182-LOC108786473
AMEXTC-0340000016255-PRR5	0	0.17936	0.068	0.005	0	META	AMEXTC-0340000016255-PRR5
AMEXTC-0340000046328-CHAD	0	0.175078	0.071	0.007	0	META	AMEXTC-0340000046328-CHAD
AMEXTC-0340000030789-ANGPTL7	0	0.17505	0.068	0.01	0	META	AMEXTC-0340000030789-ANGPTL7
AMEXTC-0340000049246-CDH16	0	0.175025	0.061	0	0	META	AMEXTC-0340000049246-CDH16
AMEXTC-0340000018458-CILP2	0	0.170927	0.082	0.018	0	META	AMEXTC-0340000018458-CILP2
AMEXTC-0340000050539-pmp2.S	0	0.165283	0.077	0.022	0	META	AMEXTC-0340000050539-pmp2.S
AMEXTC-0340000050910-FAM188B	0	0.162961	0.082	0.019	0	META	AMEXTC-0340000050910-FAM188B
AMEXTC-0340000063759-EMP1	0	0.156017	0.108	0.039	0	META	AMEXTC-0340000063759-EMP1
AMEXTC-0340000012215-TFCP2L1	0	0.148378	0.08	0.02	0	META	AMEXTC-0340000012215-TFCP2L1
AMEXTC-0340000039968-HSD17B13	0	0.146802	0.07	0.003	0	META	AMEXTC-0340000039968-HSD17B13
AMEXTC-0340000214667-FBXL18	0	0.125778	0.094	0.032	0	META	AMEXTC-0340000214667-FBXL18
AMEXTC-0340000228467-tspan1	0	0.123555	0.053	0.005	0	META	AMEXTC-0340000228467-tspan1
AMEXTC-0340000210083-OXCT1	0	0.117914	0.068	0.015	0	META	AMEXTC-0340000210083-OXCT1
AMEXTC-0340000014404-NRP1	0	0.113307	0.07	0.02	0	META	AMEXTC-0340000014404-NRP1
AMEXTC-0340000009730-CTHRC1	0	0.11226	0.094	0.027	0	META	AMEXTC-0340000009730-CTHRC1
AMEXTC-0340000176178-CHP1	1.15e-303	0.110557	0.059	0.015	2.19e-299	META	AMEXTC-0340000176178-CHP1
AMEXTC-0340000016847-thioredoxin	2.34e-287	0.140138	0.068	0.02	4.44e-283	META	AMEXTC-0340000016847-thioredoxin
AMEXTC-0340000236909-CKB	1.32e-285	0.362605	0.136	0.065	2.5e-281	META	AMEXTC-0340000236909-CKB
AMEXTC-0340000145853-lgals9c	4.11e-284	0.132879	0.072	0.023	7.8e-280	META	AMEXTC-0340000145853-lgals9c
AMEXTC-0340000291869-idh2.L	1.5e-269	0.266684	0.184	0.103	2.85e-265	META	AMEXTC-0340000291869-idh2.L
AMEXTC-0340000137798-major	9.14e-265	0.183428	0.072	0.024	1.74e-260	META	AMEXTC-0340000137798-major
AMEXTC-0340000023242-collagen	5.45e-263	0.642351	0.735	0.852	1.04e-258	META	AMEXTC-0340000023242-collagen
mRNA01119	1.74e-261	0.13924	0.079	0.028	3.31e-257	META	mRNA01119
AMEXTC-0340000012916-CLU	8.19e-251	0.201957	0.156	0.082	1.56e-246	META	AMEXTC-0340000012916-CLU
AMEXTC-0340000047511-col6a3	2.27e-244	0.42063	0.495	0.404	4.31e-240	META	AMEXTC-0340000047511-col6a3
AMEXTC-0340000123284-pdgfrl	2.14e-224	0.107351	0.107	0.049	4.07e-220	META	AMEXTC-0340000123284-pdgfrl
AMEXTC-0340000063642-Atp5b	3.04e-224	0.231146	0.24	0.154	5.77e-220	META	AMEXTC-0340000063642-Atp5b
AMEXTC-0340000066990-MDH2	2.73e-223	0.115494	0.098	0.044	5.19e-219	META	AMEXTC-0340000066990-MDH2
AMEXTC-0340000060694-MDH1	1.72e-220	0.117502	0.095	0.042	3.26e-216	META	AMEXTC-0340000060694-MDH1
AMEXTC-0340000117374-acta2	9.81e-218	0.158568	0.062	0.022	1.86e-213	META	AMEXTC-0340000117374-acta2
AMEXTC-0340000045250-col4a2.S	8.12e-204	0.217541	0.187	0.113	1.54e-199	META	AMEXTC-0340000045250-col4a2.S
AMEXTC-0340000136670-atp5f1	1.06e-203	0.110449	0.103	0.049	2.02e-199	META	AMEXTC-0340000136670-atp5f1
AMEXTC-0340000031493-OGN	5.86e-193	0.210093	0.288	0.199	1.11e-188	META	AMEXTC-0340000031493-OGN
AMEXTC-0340000016719-alpha1	2.95e-191	0.273475	0.108	0.054	5.59e-187	META	AMEXTC-0340000016719-alpha1
AMEXTC-0340000055782-serpinf1	1.72e-183	0.125964	0.203	0.127	3.28e-179	META	AMEXTC-0340000055782-serpinf1
AMEXTC-0340000018024-MFAP5	5.37e-182	0.450638	0.315	0.237	1.02e-177	META	AMEXTC-0340000018024-MFAP5
AMEXTC-0340000006533-LOC104635427	2.86e-169	0.219951	0.449	0.363	5.44e-165	META	AMEXTC-0340000006533-LOC104635427
AMEXTC-0340000004704-TAGLN	2.89e-158	0.121905	0.061	0.025	5.49e-154	META	AMEXTC-0340000004704-TAGLN
mRNA00035	9.26e-156	0.500717	0.263	0.192	1.76e-151	META	mRNA00035
AMEXTC-0340000288656-CAPG	3.46e-149	0.110396	0.131	0.076	6.57e-145	META	AMEXTC-0340000288656-CAPG
AMEXTC-0340000167467-ferritin	1.03e-143	0.213247	0.297	0.222	1.95e-139	META	AMEXTC-0340000167467-ferritin
AMEXTC-0340000062113-SLC25A3	1.46e-141	0.232465	0.301	0.227	2.78e-137	META	AMEXTC-0340000062113-SLC25A3
AMEXTC-0340000070102-beta	1.27e-139	0.128866	0.059	0.025	2.42e-135	META	AMEXTC-0340000070102-beta
AMEXTC-0340000248307-LAMA2	1.62e-139	0.105663	0.092	0.049	3.08e-135	META	AMEXTC-0340000248307-LAMA2
AMEXTC-0340000008387-sparc.S	6.33e-123	0.280278	0.707	0.752	1.2e-118	META	AMEXTC-0340000008387-sparc.S
AMEXTC-0340000005605-SULF2	2.81e-115	0.102001	0.095	0.054	5.34e-111	META	AMEXTC-0340000005605-SULF2
AMEXTC-0340000122671-Keratin	2.22e-112	0.151388	0.097	0.056	4.21e-108	META	AMEXTC-0340000122671-Keratin
AMEXTC-0340000069295-minor	6.24e-112	0.107064	0.055	0.025	1.19e-107	META	AMEXTC-0340000069295-minor
AMEXTC-0340000246688-LOC104635543	6.1e-108	0.226302	0.473	0.407	1.16e-103	META	AMEXTC-0340000246688-LOC104635543
AMEXTC-0340000042814-COL5A2	8.9e-104	0.130737	0.547	0.481	1.69e-99	META	AMEXTC-0340000042814-COL5A2
AMEXTC-0340000269387-LOC104061926	5.71e-102	0.167813	0.293	0.23	1.09e-97	META	AMEXTC-0340000269387-LOC104061926
AMEXTC-0340000014615-FN1	6.4e-95	0.124011	0.145	0.098	1.22e-90	META	AMEXTC-0340000014615-FN1
AMEXTC-0340000060301-VIM	3.71e-92	0.201215	0.475	0.57	7.04e-88	META	AMEXTC-0340000060301-VIM
AMEXTC-0340000067538-antifreeze	0.00113415	0.301001	0.372	0.388	1	META	AMEXTC-0340000067538-antifreeze
AMEXTC-0340000034061-POSTN	0	1.45081	0.354	0.19	0	WT	AMEXTC-0340000034061-POSTN
AMEXTC-0340000046713-PTX3	0	1.44715	0.304	0.051	0	WT	AMEXTC-0340000046713-PTX3
AMEXTC-0340000025689-LOC109314240	0	1.12568	0.298	0.065	0	WT	AMEXTC-0340000025689-LOC109314240
AMEXTC-0340000045453-LOC102566338	0	1.01983	0.349	0.019	0	WT	AMEXTC-0340000045453-LOC102566338
AMEXTC-0340000063538-LOC102946426	0	0.763611	0.303	0.182	0	WT	AMEXTC-0340000063538-LOC102946426
AMEXTC-0340000030858-LOC102944312	0	0.751427	0.236	0.103	0	WT	AMEXTC-0340000030858-LOC102944312
AMEXTC-0340000015355-LOC104614514	0	0.714158	0.248	0.017	0	WT	AMEXTC-0340000015355-LOC104614514
AMEXTC-0340000035899-crispld2.S	0	0.654203	0.193	0.058	0	WT	AMEXTC-0340000035899-crispld2.S
AMEXTC-0340000053619-KRT4	0	0.627474	0.231	0.01	0	WT	AMEXTC-0340000053619-KRT4
AMEXTC-0340000021479-col12a1	0	0.612026	0.312	0.189	0	WT	AMEXTC-0340000021479-col12a1
AMEXTC-0340000050145-SERPINE1	0	0.565327	0.171	0.045	0	WT	AMEXTC-0340000050145-SERPINE1
AMEXTC-0340000060437-LOC100555387	0	0.525354	0.237	0.111	0	WT	AMEXTC-0340000060437-LOC100555387
AMEXTC-0340000242856-ucp2	0	0.499987	0.14	0.025	0	WT	AMEXTC-0340000242856-ucp2
AMEXTC-0340000281092-adh4	0	0.496689	0.341	0.192	0	WT	AMEXTC-0340000281092-adh4
AMEXTC-0340000250166-RHOB	0	0.490904	0.187	0.071	0	WT	AMEXTC-0340000250166-RHOB
AMEXTC-0340000059978-EEF1A1	0	0.459016	0.914	0.849	0	WT	AMEXTC-0340000059978-EEF1A1
AMEXTC-0340000040950-ferritin	0	0.416525	0.811	0.685	0	WT	AMEXTC-0340000040950-ferritin
AMEXTC-0340000059747-HIF3A	0	0.413564	0.176	0.083	0	WT	AMEXTC-0340000059747-HIF3A
AMEXTC-0340000204604-c2.L	0	0.384178	0.124	0.035	0	WT	AMEXTC-0340000204604-c2.L
AMEXTC-0340000293224-prdx6.S	0	0.361737	0.144	0.049	0	WT	AMEXTC-0340000293224-prdx6.S
AMEXTC-0340000119775-LOC101397869	0	0.359887	0.169	0.073	0	WT	AMEXTC-0340000119775-LOC101397869
AMEXTC-0340000290800-pcolce.L	0	0.324617	0.178	0.082	0	WT	AMEXTC-0340000290800-pcolce.L
AMEXTC-0340000058382-SPOCK3	0	0.252652	0.068	0.007	0	WT	AMEXTC-0340000058382-SPOCK3
AMEXTC-0340000045125-glul	0	0.241486	0.083	0.017	0	WT	AMEXTC-0340000045125-glul
AMEXTC-0340000047127-ADAMTS4	0	0.240056	0.083	0.017	0	WT	AMEXTC-0340000047127-ADAMTS4
AMEXTC-0340000010741-EMILIN2	0	0.231107	0.094	0.024	0	WT	AMEXTC-0340000010741-EMILIN2
AMEXTC-0340000062486-LGALS3BP	0	0.209133	0.097	0.023	0	WT	AMEXTC-0340000062486-LGALS3BP
AMEXTC-0340000052801-pah	0	0.208965	0.069	0.003	0	WT	AMEXTC-0340000052801-pah
AMEXTC-0340000196671-LOC102362757	0	0.192758	0.07	0.009	0	WT	AMEXTC-0340000196671-LOC102362757
AMEXTC-0340000022062-CLEC3B	1.43e-304	0.189678	0.082	0.017	2.71e-300	WT	AMEXTC-0340000022062-CLEC3B
AMEXTC-0340000061995-RNA-binding	3.96e-303	0.416016	0.612	0.511	7.53e-299	WT	AMEXTC-0340000061995-RNA-binding
AMEXTC-0340000233495-SQSTM1	5.98e-285	0.247567	0.105	0.034	1.14e-280	WT	AMEXTC-0340000233495-SQSTM1
AMEXTC-0340000021794-connexin	6.07e-278	0.177488	0.069	0.012	1.15e-273	WT	AMEXTC-0340000021794-connexin
AMEXTC-0340000157709-LOC106904245	9.94e-263	0.406194	0.534	0.45	1.89e-258	WT	AMEXTC-0340000157709-LOC106904245
AMEXTC-0340000044247-LOC104371679	1.15e-261	0.448493	0.231	0.137	2.18e-257	WT	AMEXTC-0340000044247-LOC104371679
AMEXTC-0340000041346-Gfpt2	7.66e-260	0.206379	0.076	0.018	1.46e-255	WT	AMEXTC-0340000041346-Gfpt2
AMEXTC-0340000034460-hgd	4.21e-243	0.158898	0.066	0.014	8e-239	WT	AMEXTC-0340000034460-hgd
AMEXTC-0340000059242-DUSP1	1.17e-238	0.514777	0.279	0.19	2.22e-234	WT	AMEXTC-0340000059242-DUSP1
AMEXTC-0340000124041-complement	3.14e-234	0.268999	0.09	0.03	5.96e-230	WT	AMEXTC-0340000124041-complement
AMEXTC-0340000236745-rpl21	2.52e-228	0.309295	0.297	0.202	4.78e-224	WT	AMEXTC-0340000236745-rpl21
AMEXTC-0340000023604-FBLN1	9.7e-215	0.245305	0.107	0.044	1.84e-210	WT	AMEXTC-0340000023604-FBLN1
AMEXTC-0340000051786-QDPR	6.17e-213	0.151979	0.07	0.019	1.17e-208	WT	AMEXTC-0340000051786-QDPR
AMEXTC-0340000062252-BTG1	2.22e-211	0.309193	0.163	0.088	4.21e-207	WT	AMEXTC-0340000062252-BTG1
AMEXTC-0340000031604-Ethanolamine-phosphate	3.68e-209	0.193695	0.065	0.017	6.99e-205	WT	AMEXTC-0340000031604-Ethanolamine-phosphate
AMEXTC-0340000052851-APCDD1	8.32e-204	0.121551	0.052	0.009	1.58e-199	WT	AMEXTC-0340000052851-APCDD1
AMEXTC-0340000070693-rps8	2.12e-203	0.11647	0.091	0.034	4.03e-199	WT	AMEXTC-0340000070693-rps8
AMEXTC-0340000122146-DDIT4	6.07e-197	0.25492	0.114	0.052	1.15e-192	WT	AMEXTC-0340000122146-DDIT4
AMEXTC-0340000062686-LOC109317542	1.19e-192	0.166651	0.095	0.038	2.26e-188	WT	AMEXTC-0340000062686-LOC109317542
AMEXTC-0340000000577-GSN	7.81e-187	0.310804	0.219	0.141	1.48e-182	WT	AMEXTC-0340000000577-GSN
AMEXTC-0340000155499-ferritin	2.13e-179	0.174608	0.092	0.038	4.04e-175	WT	AMEXTC-0340000155499-ferritin
AMEXTC-0340000060989-mmp19.L	4.55e-177	0.160984	0.056	0.015	8.65e-173	WT	AMEXTC-0340000060989-mmp19.L
AMEXTC-0340000018570-THBS2	2.83e-169	0.303081	0.176	0.107	5.37e-165	WT	AMEXTC-0340000018570-THBS2
AMEXTC-0340000045148-ALAS1	8.53e-168	0.426276	0.1	0.047	1.62e-163	WT	AMEXTC-0340000045148-ALAS1
AMEXTC-0340000055894-RPL4	3.5e-163	0.296924	0.357	0.279	6.65e-159	WT	AMEXTC-0340000055894-RPL4
AMEXTC-0340000051107-hypothetical	3.81e-162	0.312431	0.475	0.407	7.24e-158	WT	AMEXTC-0340000051107-hypothetical
AMEXTC-0340000056568-LOC106731755	9.67e-156	0.239787	0.422	0.341	1.84e-151	WT	AMEXTC-0340000056568-LOC106731755
AMEXTC-0340000055421-cytoplasmic	1.05e-154	0.306983	0.782	0.762	1.99e-150	WT	AMEXTC-0340000055421-cytoplasmic
AMEXTC-0340000053074-PDK4	1.25e-152	0.135569	0.058	0.019	2.37e-148	WT	AMEXTC-0340000053074-PDK4
AMEXTC-0340000281129-RASL11B	3.52e-149	0.153609	0.064	0.023	6.69e-145	WT	AMEXTC-0340000281129-RASL11B
AMEXTC-0340000021455-CEBPD	2.42e-142	0.260551	0.17	0.107	4.6e-138	WT	AMEXTC-0340000021455-CEBPD
AMEXTC-0340000031667-COL4A6	3.15e-142	0.190708	0.061	0.022	5.98e-138	WT	AMEXTC-0340000031667-COL4A6
AMEXTC-0340000147566-RPL13	3.37e-136	0.319054	0.471	0.412	6.41e-132	WT	AMEXTC-0340000147566-RPL13
AMEXTC-0340000218837-LOC102933164	1.39e-132	0.259021	0.269	0.198	2.64e-128	WT	AMEXTC-0340000218837-LOC102933164
AMEXTC-0340000054892-hypothetical	1.01e-129	0.193291	0.11	0.059	1.91e-125	WT	AMEXTC-0340000054892-hypothetical
AMEXTC-0340000135861-RPL13A	1.74e-125	0.252989	0.318	0.25	3.3e-121	WT	AMEXTC-0340000135861-RPL13A
AMEXTC-0340000227252-rpsa.S	2.87e-124	0.2514	0.335	0.266	5.45e-120	WT	AMEXTC-0340000227252-rpsa.S
AMEXTC-0340000204279-LOC108790145	3.04e-120	0.214561	0.098	0.052	5.78e-116	WT	AMEXTC-0340000204279-LOC108790145
AMEXTC-0340000148294-RACK1	1.4e-119	0.271987	0.39	0.327	2.65e-115	WT	AMEXTC-0340000148294-RACK1
AMEXTC-0340000039804-synapse	5.05e-119	0.251	0.241	0.176	9.6e-115	WT	AMEXTC-0340000039804-synapse
AMEXTC-0340000277529-LOC102362582	9.32e-118	0.179149	0.102	0.056	1.77e-113	WT	AMEXTC-0340000277529-LOC102362582
AMEXTC-0340000218103-LRP1	1.35e-117	0.162185	0.096	0.051	2.56e-113	WT	AMEXTC-0340000218103-LRP1
AMEXTC-0340000117753-BHMT	7.83e-116	0.233256	0.216	0.155	1.49e-111	WT	AMEXTC-0340000117753-BHMT
AMEXTC-0340000062704-PRMT1	1.24e-115	0.189999	0.151	0.097	2.35e-111	WT	AMEXTC-0340000062704-PRMT1
AMEXTC-0340000159671-CISH	1.88e-114	0.110735	0.051	0.018	3.56e-110	WT	AMEXTC-0340000159671-CISH
AMEXTC-0340000064511-MARCKS	1.24e-112	0.21636	0.176	0.119	2.35e-108	WT	AMEXTC-0340000064511-MARCKS
AMEXTC-0340000020850-EFEMP2	2.55e-112	0.165415	0.098	0.053	4.84e-108	WT	AMEXTC-0340000020850-EFEMP2
AMEXTC-0340000039935-FBN3	8.01e-109	0.183565	0.122	0.074	1.52e-104	WT	AMEXTC-0340000039935-FBN3
AMEXTC-0340000230218-FCN3	1.75e-108	0.11548	0.062	0.027	3.33e-104	WT	AMEXTC-0340000230218-FCN3
mRNA00488	6.7e-107	0.138784	0.125	0.076	1.27e-102	WT	mRNA00488
AMEXTC-0340000163059-SLC20A1	9.31e-104	0.206514	0.102	0.059	1.77e-99	WT	AMEXTC-0340000163059-SLC20A1
AMEXTC-0340000029132-LOC108698570	6.4e-102	0.116331	0.062	0.028	1.22e-97	WT	AMEXTC-0340000029132-LOC108698570
AMEXTC-0340000039800-LOC494636	1.23e-101	0.307027	0.329	0.271	2.35e-97	WT	AMEXTC-0340000039800-LOC494636
AMEXTC-0340000260356-NAP1L1	1.65e-101	0.22676	0.233	0.175	3.14e-97	WT	AMEXTC-0340000260356-NAP1L1
AMEXTC-0340000033451-ABCA1	3.02e-101	0.111717	0.061	0.027	5.74e-97	WT	AMEXTC-0340000033451-ABCA1
AMEXTC-0340000131392-LOC107084780	3.35e-99	0.278252	0.436	0.383	6.37e-95	WT	AMEXTC-0340000131392-LOC107084780
AMEXTC-0340000002264-CCNL2	3.45e-96	0.123311	0.065	0.032	6.56e-92	WT	AMEXTC-0340000002264-CCNL2
AMEXTC-0340000273780-FAH	3.51e-94	0.121211	0.069	0.035	6.67e-90	WT	AMEXTC-0340000273780-FAH
AMEXTC-0340000060912-DBF4B	1.13e-92	0.348793	0.468	0.435	2.14e-88	WT	AMEXTC-0340000060912-DBF4B
AMEXTC-0340000021736-OLFML2A	2.17e-86	0.112943	0.055	0.025	4.12e-82	WT	AMEXTC-0340000021736-OLFML2A
AMEXTC-0340000056997-HNRNPK	2.55e-86	0.226769	0.2	0.149	4.83e-82	WT	AMEXTC-0340000056997-HNRNPK
AMEXTC-0340000005722-adamts1	4.96e-85	0.167747	0.095	0.057	9.41e-81	WT	AMEXTC-0340000005722-adamts1
AMEXTC-0340000233355-ZFP36L2	4.8e-83	0.156201	0.09	0.054	9.12e-79	WT	AMEXTC-0340000233355-ZFP36L2
AMEXTC-0340000018602-LOC104614833	5.64e-83	0.101185	0.055	0.026	1.07e-78	WT	AMEXTC-0340000018602-LOC104614833
AMEXTC-0340000006345-F5	3.21e-81	0.136271	0.066	0.034	6.09e-77	WT	AMEXTC-0340000006345-F5
AMEXTC-0340000002589-PROS1	9.24e-80	0.105639	0.068	0.037	1.75e-75	WT	AMEXTC-0340000002589-PROS1
AMEXTC-0340000016655-SPON1	1.59e-76	0.127271	0.075	0.043	3.02e-72	WT	AMEXTC-0340000016655-SPON1
AMEXTC-0340000175976-nucleotide-binding	4.74e-76	0.215638	0.169	0.125	9.01e-72	WT	AMEXTC-0340000175976-nucleotide-binding
AMEXTC-0340000260404-txnip	2.66e-74	0.204037	0.155	0.112	5.05e-70	WT	AMEXTC-0340000260404-txnip
AMEXTC-0340000256807-myeloid	8.39e-73	0.187811	0.142	0.101	1.59e-68	WT	AMEXTC-0340000256807-myeloid
AMEXTC-0340000060653-LOC100917284	1.2e-72	0.160896	0.089	0.055	2.29e-68	WT	AMEXTC-0340000060653-LOC100917284
AMEXTC-0340000028461-nucleotide-binding	1.54e-72	0.124048	0.069	0.039	2.92e-68	WT	AMEXTC-0340000028461-nucleotide-binding
AMEXTC-0340000049484-rps27a	2.8e-72	0.238295	0.401	0.357	5.33e-68	WT	AMEXTC-0340000049484-rps27a
AMEXTC-0340000061036-protein	6.01e-72	0.294799	0.48	0.455	1.14e-67	WT	AMEXTC-0340000061036-protein
AMEXTC-0340000221079-xicl	7.33e-72	0.219862	0.147	0.106	1.39e-67	WT	AMEXTC-0340000221079-xicl
AMEXTC-0340000054181-arrdc2	1.98e-71	0.183747	0.123	0.084	3.75e-67	WT	AMEXTC-0340000054181-arrdc2
AMEXTC-0340000055751-LOC108789125	5.79e-70	0.101686	0.073	0.042	1.1e-65	WT	AMEXTC-0340000055751-LOC108789125
AMEXTC-0340000065047-rplp0.L	1.34e-68	0.237934	0.299	0.254	2.55e-64	WT	AMEXTC-0340000065047-rplp0.L
AMEXTC-0340000067522-Rps16-ps2	3.54e-68	0.207737	0.19	0.147	6.72e-64	WT	AMEXTC-0340000067522-Rps16-ps2
AMEXTC-0340000066295-ferritin	1.76e-66	0.198387	0.299	0.247	3.35e-62	WT	AMEXTC-0340000066295-ferritin
AMEXTC-0340000036622-MKNK2	1.43e-64	0.100686	0.057	0.031	2.72e-60	WT	AMEXTC-0340000036622-MKNK2
AMEXTC-0340000005367-CMTM5	1.03e-63	0.102473	0.073	0.044	1.96e-59	WT	AMEXTC-0340000005367-CMTM5
AMEXTC-0340000250610-hypothetical	6.1e-63	0.239798	0.362	0.321	1.16e-58	WT	AMEXTC-0340000250610-hypothetical
AMEXTC-0340000022394-TNFAIP6	1.23e-58	0.104215	0.071	0.043	2.34e-54	WT	AMEXTC-0340000022394-TNFAIP6
AMEXTC-0340000029609-EIF5A	7.87e-58	0.273475	0.354	0.32	1.5e-53	WT	AMEXTC-0340000029609-EIF5A
AMEXTC-0340000030769-KLF2	2.08e-56	0.226247	0.112	0.079	3.95e-52	WT	AMEXTC-0340000030769-KLF2
AMEXTC-0340000041456-complement	2.18e-54	0.26546	0.071	0.044	4.14e-50	WT	AMEXTC-0340000041456-complement
AMEXTC-0340000193751-RPS18	9.28e-54	0.133359	0.15	0.113	1.76e-49	WT	AMEXTC-0340000193751-RPS18
AMEXTC-0340000207707-thrombospondin-1	1.02e-53	0.165393	0.142	0.107	1.93e-49	WT	AMEXTC-0340000207707-thrombospondin-1
AMEXTC-0340000023726-FHL2	1.95e-53	0.125592	0.098	0.067	3.7e-49	WT	AMEXTC-0340000023726-FHL2
AMEXTC-0340000013066-PTGS2	3.94e-53	0.201141	0.112	0.08	7.49e-49	WT	AMEXTC-0340000013066-PTGS2
AMEXTC-0340000035200-SFRP2	4.85e-53	0.101972	0.06	0.035	9.21e-49	WT	AMEXTC-0340000035200-SFRP2
AMEXTC-0340000067197-rps28p9	4e-52	0.210626	0.208	0.171	7.6e-48	WT	AMEXTC-0340000067197-rps28p9
AMEXTC-0340000190175-COL16A1	7.8e-52	0.135359	0.121	0.089	1.48e-47	WT	AMEXTC-0340000190175-COL16A1
AMEXTC-0340000067649-60S	1.68e-51	0.1607	0.204	0.164	3.2e-47	WT	AMEXTC-0340000067649-60S
AMEXTC-0340000269275-transgelin-2	4.52e-50	0.208204	0.255	0.217	8.59e-46	WT	AMEXTC-0340000269275-transgelin-2
AMEXTC-0340000140651-mvp.L	1.4e-49	0.177005	0.202	0.164	2.65e-45	WT	AMEXTC-0340000140651-mvp.L
AMEXTC-0340000066526-RPL17	4.49e-49	0.24039	0.269	0.233	8.53e-45	WT	AMEXTC-0340000066526-RPL17
AMEXTC-0340000060391-ncl.S	9.8e-49	0.205104	0.241	0.203	1.86e-44	WT	AMEXTC-0340000060391-ncl.S
AMEXTC-0340000059501-RPL8	1.16e-48	0.25156	0.443	0.419	2.2e-44	WT	AMEXTC-0340000059501-RPL8
AMEXTC-0340000039309-hypothetical	1.34e-48	0.128235	0.28	0.238	2.54e-44	WT	AMEXTC-0340000039309-hypothetical
AMEXTC-0340000226440-SET	1.67e-48	0.165255	0.206	0.168	3.17e-44	WT	AMEXTC-0340000226440-SET
AMEXTC-0340000138910-myh9	1.91e-48	0.107921	0.112	0.081	3.64e-44	WT	AMEXTC-0340000138910-myh9
AMEXTC-0340000128156-LOC102940625	2.39e-48	0.354577	0.118	0.086	4.54e-44	WT	AMEXTC-0340000128156-LOC102940625
AMEXTC-0340000050527-eef1b2.L	3.35e-48	0.147603	0.271	0.231	6.36e-44	WT	AMEXTC-0340000050527-eef1b2.L
AMEXTC-0340000183167-emp3	1.19e-47	0.122897	0.076	0.051	2.25e-43	WT	AMEXTC-0340000183167-emp3
AMEXTC-0340000129040-SRI	1.47e-46	0.144712	0.159	0.125	2.8e-42	WT	AMEXTC-0340000129040-SRI
AMEXTC-0340000068025-RBP4	2.27e-46	0.197044	0.127	0.096	4.32e-42	WT	AMEXTC-0340000068025-RBP4
AMEXTC-0340000195029-RPL7A	1.33e-45	0.230373	0.429	0.402	2.53e-41	WT	AMEXTC-0340000195029-RPL7A
AMEXTC-0340000250550-Cd81	4.27e-45	0.136545	0.147	0.114	8.12e-41	WT	AMEXTC-0340000250550-Cd81
AMEXTC-0340000139919-RPL5	5.65e-45	0.211193	0.279	0.245	1.07e-40	WT	AMEXTC-0340000139919-RPL5
AMEXTC-0340000061860-CAT	1.31e-44	0.180093	0.219	0.183	2.48e-40	WT	AMEXTC-0340000061860-CAT
AMEXTC-0340000033751-olfml3	3.13e-44	0.151071	0.181	0.146	5.94e-40	WT	AMEXTC-0340000033751-olfml3
AMEXTC-0340000005238-LOC100486063	3.39e-44	0.136564	0.095	0.068	6.43e-40	WT	AMEXTC-0340000005238-LOC100486063
AMEXTC-0340000067657-RPL22	1.01e-43	0.17197	0.158	0.125	1.92e-39	WT	AMEXTC-0340000067657-RPL22
AMEXTC-0340000014829-HNRNPU	2.32e-43	0.132459	0.114	0.085	4.41e-39	WT	AMEXTC-0340000014829-HNRNPU
AMEXTC-0340000067195-LOC106904245	1.06e-42	0.134225	0.132	0.101	2.02e-38	WT	AMEXTC-0340000067195-LOC106904245
AMEXTC-0340000064290-zfp36l1	2.68e-40	0.116411	0.092	0.066	5.1e-36	WT	AMEXTC-0340000064290-zfp36l1
AMEXTC-0340000067721-RPS11	4.42e-40	0.132089	0.188	0.154	8.4e-36	WT	AMEXTC-0340000067721-RPS11
AMEXTC-0340000032782-tnc	2.68e-36	0.126051	0.105	0.079	5.09e-32	WT	AMEXTC-0340000032782-tnc
AMEXTC-0340000066447-LOC103234934	9.92e-36	0.196687	0.395	0.368	1.88e-31	WT	AMEXTC-0340000066447-LOC103234934
AMEXTC-0340000048324-LOC102698167	1.77e-35	0.134832	0.132	0.105	3.36e-31	WT	AMEXTC-0340000048324-LOC102698167
AMEXTC-0340000266533-RPL31	7.8e-35	0.130675	0.251	0.216	1.48e-30	WT	AMEXTC-0340000266533-RPL31
AMEXTC-0340000232945-tuba1a.L	2.31e-34	0.164949	0.172	0.143	4.4e-30	WT	AMEXTC-0340000232945-tuba1a.L
AMEXTC-0340000222640-APH1A	7.01e-34	0.195663	0.364	0.338	1.33e-29	WT	AMEXTC-0340000222640-APH1A
AMEXTC-0340000037855-pcbp3	7.83e-32	0.210053	0.246	0.219	1.49e-27	WT	AMEXTC-0340000037855-pcbp3
AMEXTC-0340000065596-UBC	2.81e-31	0.259235	0.341	0.321	5.33e-27	WT	AMEXTC-0340000065596-UBC
AMEXTC-0340000126210-early	3.19e-31	0.176083	0.14	0.115	6.05e-27	WT	AMEXTC-0340000126210-early
AMEXTC-0340000062072-RPS3	8.46e-31	0.110179	0.208	0.177	1.61e-26	WT	AMEXTC-0340000062072-RPS3
AMEXTC-0340000173995-CALD1	5.22e-30	0.124759	0.124	0.1	9.92e-26	WT	AMEXTC-0340000173995-CALD1
AMEXTC-0340000046231-MFAP2	9.34e-30	0.144867	0.138	0.113	1.77e-25	WT	AMEXTC-0340000046231-MFAP2
AMEXTC-0340000182895-RPS3A	8.67e-28	0.150444	0.247	0.221	1.65e-23	WT	AMEXTC-0340000182895-RPS3A
AMEXTC-0340000057334-cathepsin	2.09e-27	0.110283	0.093	0.072	3.98e-23	WT	AMEXTC-0340000057334-cathepsin
AMEXTC-0340000249940-rpl18.L	5.52e-27	0.138847	0.233	0.205	1.05e-22	WT	AMEXTC-0340000249940-rpl18.L
AMEXTC-0340000012433-hypothetical	9.62e-27	0.116658	0.159	0.134	1.83e-22	WT	AMEXTC-0340000012433-hypothetical
AMEXTC-0340000182972-RPL10A	2.79e-25	0.21079	0.347	0.329	5.3e-21	WT	AMEXTC-0340000182972-RPL10A
AMEXTC-0340000067496-RPS23	4.55e-25	0.208847	0.25	0.228	8.63e-21	WT	AMEXTC-0340000067496-RPS23
AMEXTC-0340000260799-LOC102933150	5.32e-23	0.154631	0.117	0.095	1.01e-18	WT	AMEXTC-0340000260799-LOC102933150
AMEXTC-0340000048009-reverse-2	1.36e-21	0.132336	0.155	0.134	2.59e-17	WT	AMEXTC-0340000048009-reverse-2
AMEXTC-0340000267509-NFKBIA	6.65e-21	0.129952	0.199	0.175	1.26e-16	WT	AMEXTC-0340000267509-NFKBIA
AMEXTC-0340000032501-RPL23	2.63e-20	0.172586	0.257	0.236	5e-16	WT	AMEXTC-0340000032501-RPL23
AMEXTC-0340000139860-RPS6	1.08e-19	0.211559	0.419	0.411	2.05e-15	WT	AMEXTC-0340000139860-RPS6
AMEXTC-0340000070910-LOC100337691	3.69e-19	0.101238	0.21	0.187	7e-15	WT	AMEXTC-0340000070910-LOC100337691
AMEXTC-0340000057623-ferritin	2.83e-18	0.112048	0.092	0.075	5.38e-14	WT	AMEXTC-0340000057623-ferritin
AMEXTC-0340000268759-RPL7	5.78e-17	0.182537	0.349	0.338	1.1e-12	WT	AMEXTC-0340000268759-RPL7
AMEXTC-0340000149167-rps15	8.34e-16	0.109452	0.154	0.136	1.58e-11	WT	AMEXTC-0340000149167-rps15
AMEXTC-0340000147850-FKBP10	1.3e-14	0.121417	0.169	0.153	2.47e-10	WT	AMEXTC-0340000147850-FKBP10
AMEXTC-0340000067981-RPL6	3.79e-14	0.15805	0.298	0.284	7.21e-10	WT	AMEXTC-0340000067981-RPL6
AMEXTC-0340000017630-zgc:153867	5.61e-14	0.128571	0.187	0.171	1.07e-09	WT	AMEXTC-0340000017630-zgc:153867
AMEXTC-0340000260738-EIF3F	8.45e-14	0.11328	0.124	0.109	1.6e-09	WT	AMEXTC-0340000260738-EIF3F
AMEXTC-0340000171595-ywhaq	2.64e-13	0.16525	0.414	0.408	5.02e-09	WT	AMEXTC-0340000171595-ywhaq
AMEXTC-0340000058084-ITM2A	2.71e-12	0.160051	0.205	0.191	5.15e-08	WT	AMEXTC-0340000058084-ITM2A
AMEXTC-0340000144213-LAMB1	4.4e-12	0.117067	0.173	0.157	8.35e-08	WT	AMEXTC-0340000144213-LAMB1
AMEXTC-0340000256869-LOC100494403	6.11e-12	0.125638	0.293	0.279	1.16e-07	WT	AMEXTC-0340000256869-LOC100494403
AMEXTC-0340000227208-hypothetical	1.09e-11	0.107009	0.168	0.152	2.07e-07	WT	AMEXTC-0340000227208-hypothetical
AMEXTC-0340000053070-RPL10	3.73e-11	0.144882	0.32	0.31	7.08e-07	WT	AMEXTC-0340000053070-RPL10
AMEXTC-0340000202959-LOC100565496	9.02e-10	0.137733	0.178	0.166	1.71e-05	WT	AMEXTC-0340000202959-LOC100565496
AMEXTC-0340000050083-LOC444845	9.1e-10	0.115815	0.175	0.162	1.73e-05	WT	AMEXTC-0340000050083-LOC444845
AMEXTC-0340000115276-RPL26L1	2.75e-09	0.104696	0.137	0.124	5.23e-05	WT	AMEXTC-0340000115276-RPL26L1
AMEXTC-0340000037784-fkbp9.L	5.67e-09	0.113984	0.134	0.122	0.000107758	WT	AMEXTC-0340000037784-fkbp9.L
AMEXTC-0340000152570-gpa33.L	6.64e-09	0.133384	0.185	0.174	0.000126108	WT	AMEXTC-0340000152570-gpa33.L
AMEXTC-0340000174773-rpl24	1.75e-08	0.155647	0.259	0.249	0.000333185	WT	AMEXTC-0340000174773-rpl24
AMEXTC-0340000059583-cytokeratin	5.07e-08	0.297993	0.328	0.379	0.000963652	WT	AMEXTC-0340000059583-cytokeratin
AMEXTC-0340000062036-BGN	1.18e-07	0.130606	0.406	0.397	0.0022377	WT	AMEXTC-0340000062036-BGN
AMEXTC-0340000033862-HSP90AB1	1.47e-07	0.160095	0.465	0.469	0.00279711	WT	AMEXTC-0340000033862-HSP90AB1
AMEXTC-0340000067483-LOC106589173	2.75e-07	0.137451	0.24	0.231	0.00523266	WT	AMEXTC-0340000067483-LOC106589173
AMEXTC-0340000066413-EEF2	3.57e-06	0.189667	0.324	0.326	0.0677321	WT	AMEXTC-0340000066413-EEF2
AMEXTC-0340000070861-RPL27A	2.03e-05	0.106177	0.233	0.225	0.38473	WT	AMEXTC-0340000070861-RPL27A
AMEXTC-0340000257024-cysteine-rich	5.79e-05	0.131456	0.121	0.115	1	WT	AMEXTC-0340000257024-cysteine-rich
AMEXTC-0340000179322-TPT1	0.001314	0.172455	0.316	0.35	1	WT	AMEXTC-0340000179322-TPT1
AMEXTC-0340000275186-KRT18	0.00212772	0.167744	0.248	0.271	1	WT	AMEXTC-0340000275186-KRT18
mRNA01206	0.00718719	0.109719	0.25	0.248	1	WT	mRNA01206

## Sheet: DEGs_Epithelial_cells
	p_val	avg_log2FC	pct.1	pct.2	p_val_adj	cluster	gene
mRNA00571	0	1.37719	0.062	0.001	0	META	mRNA00571
AMEXTC-0340000114746-lgals2	0	1.04746	0.414	0.132	0	META	AMEXTC-0340000114746-lgals2
AMEXTC-0340000063129-hypothetical	0	0.941837	0.141	0.021	0	META	AMEXTC-0340000063129-hypothetical
AMEXTC-0340000066295-ferritin	0	0.701154	0.555	0.396	0	META	AMEXTC-0340000066295-ferritin
AMEXTC-0340000117228-LOC101391786	0	0.661107	0.359	0.124	0	META	AMEXTC-0340000117228-LOC101391786
AMEXTC-0340000066381-keratin	0	0.614173	0.12	0.074	0	META	AMEXTC-0340000066381-keratin
AMEXTC-0340000056774-LOC102094221	0	0.596858	0.11	0.034	0	META	AMEXTC-0340000056774-LOC102094221
AMEXTC-0340000122616-slc15a1.S	0	0.592026	0.346	0.128	0	META	AMEXTC-0340000122616-slc15a1.S
AMEXTC-0340000027344-LOC108787111	0	0.567588	0.06	0	0	META	AMEXTC-0340000027344-LOC108787111
AMEXTC-0340000145853-lgals9c	0	0.552231	0.303	0.088	0	META	AMEXTC-0340000145853-lgals9c
AMEXTC-0340000260799-LOC102933150	0	0.505298	0.493	0.19	0	META	AMEXTC-0340000260799-LOC102933150
AMEXTC-0340000228467-tspan1	0	0.485591	0.196	0.055	0	META	AMEXTC-0340000228467-tspan1
AMEXTC-0340000059583-cytokeratin	0	0.485016	0.417	0.171	0	META	AMEXTC-0340000059583-cytokeratin
AMEXTC-0340000132553-SELENOP	0	0.445665	0.386	0.186	0	META	AMEXTC-0340000132553-SELENOP
AMEXTC-0340000019606-hypothetical	0	0.435804	0.375	0.171	0	META	AMEXTC-0340000019606-hypothetical
AMEXTC-0340000046987-sodefrin	0	0.414463	0.073	0.018	0	META	AMEXTC-0340000046987-sodefrin
AMEXTC-0340000171041-LOC108708207	0	0.382189	0.299	0.103	0	META	AMEXTC-0340000171041-LOC108708207
AMEXTC-0340000006303-LOC107396020	0	0.357521	0.283	0.113	0	META	AMEXTC-0340000006303-LOC107396020
AMEXTC-0340000197281-ALDH1A1	0	0.354775	0.294	0.121	0	META	AMEXTC-0340000197281-ALDH1A1
AMEXTC-0340000150083-LOC102694931	0	0.344364	0.302	0.12	0	META	AMEXTC-0340000150083-LOC102694931
AMEXTC-0340000050203-hypothetical	0	0.324511	0.085	0.04	0	META	AMEXTC-0340000050203-hypothetical
AMEXTC-0340000023116-LOC102932655	0	0.321113	0.247	0.087	0	META	AMEXTC-0340000023116-LOC102932655
AMEXTC-0340000034589-crip1	0	0.309817	0.23	0.073	0	META	AMEXTC-0340000034589-crip1
AMEXTC-0340000222270-PEPD	0	0.309585	0.213	0.078	0	META	AMEXTC-0340000222270-PEPD
AMEXTC-0340000024264-chka.L	0	0.298933	0.203	0.066	0	META	AMEXTC-0340000024264-chka.L
AMEXTC-0340000142723-oat.1	0	0.297462	0.194	0.071	0	META	AMEXTC-0340000142723-oat.1
AMEXTC-0340000162060-alpi.1.L	0	0.296003	0.211	0.078	0	META	AMEXTC-0340000162060-alpi.1.L
AMEXTC-0340000064298-APLP2	0	0.28837	0.254	0.093	0	META	AMEXTC-0340000064298-APLP2
AMEXTC-0340000062173-Angiogenin	0	0.283897	0.131	0.024	0	META	AMEXTC-0340000062173-Angiogenin
AMEXTC-0340000041456-complement	0	0.281684	0.093	0.006	0	META	AMEXTC-0340000041456-complement
AMEXTC-0340000053991-LOC104912428	0	0.280302	0.214	0.07	0	META	AMEXTC-0340000053991-LOC104912428
AMEXTC-0340000046733-LMNA	0	0.272287	0.253	0.113	0	META	AMEXTC-0340000046733-LMNA
AMEXTC-0340000185771-slc13a2.S	0	0.271095	0.18	0.054	0	META	AMEXTC-0340000185771-slc13a2.S
AMEXTC-0340000002622-LOC108795422	0	0.265657	0.235	0.093	0	META	AMEXTC-0340000002622-LOC108795422
AMEXTC-0340000042092-UGT2B17	0	0.260998	0.062	0.01	0	META	AMEXTC-0340000042092-UGT2B17
AMEXTC-0340000019360-LOC107302476	0	0.25788	0.447	0.309	0	META	AMEXTC-0340000019360-LOC107302476
AMEXTC-0340000014786-COL17A1	0	0.251392	0.07	0.019	0	META	AMEXTC-0340000014786-COL17A1
AMEXTC-0340000057435-SLC3A2	0	0.248885	0.244	0.11	0	META	AMEXTC-0340000057435-SLC3A2
AMEXTC-0340000269339-P4HB	0	0.248764	0.33	0.178	0	META	AMEXTC-0340000269339-P4HB
AMEXTC-0340000050026-LOC110085547	0	0.242761	0.202	0.083	0	META	AMEXTC-0340000050026-LOC110085547
AMEXTC-0340000226449-LOC104633515	0	0.239308	0.137	0.023	0	META	AMEXTC-0340000226449-LOC104633515
AMEXTC-0340000045079-LOC102932760	0	0.236731	0.071	0.002	0	META	AMEXTC-0340000045079-LOC102932760
AMEXTC-0340000202316-STOM	0	0.234232	0.165	0.046	0	META	AMEXTC-0340000202316-STOM
AMEXTC-0340000025767-MPP1	0	0.233401	0.187	0.069	0	META	AMEXTC-0340000025767-MPP1
AMEXTC-0340000120041-LOC108696625	0	0.232947	0.201	0.088	0	META	AMEXTC-0340000120041-LOC108696625
AMEXTC-0340000043895-LOC102947053	0	0.228136	0.119	0.018	0	META	AMEXTC-0340000043895-LOC102947053
AMEXTC-0340000275186-KRT18	0	0.227947	0.226	0.086	0	META	AMEXTC-0340000275186-KRT18
AMEXTC-0340000016904-LOC106038159	0	0.225217	0.242	0.104	0	META	AMEXTC-0340000016904-LOC106038159
AMEXTC-0340000009097-SLC43A2	0	0.224944	0.218	0.101	0	META	AMEXTC-0340000009097-SLC43A2
AMEXTC-0340000275213-enpp7	0	0.224684	0.164	0.059	0	META	AMEXTC-0340000275213-enpp7
AMEXTC-0340000125239-LSU	0	0.222634	0.073	0.025	0	META	AMEXTC-0340000125239-LSU
AMEXTC-0340000197936-atp1a1.L	0	0.221207	0.224	0.095	0	META	AMEXTC-0340000197936-atp1a1.L
AMEXTC-0340000020700-SLC4A4	0	0.208085	0.144	0.041	0	META	AMEXTC-0340000020700-SLC4A4
AMEXTC-0340000047560-TM4SF20	0	0.207344	0.132	0.028	0	META	AMEXTC-0340000047560-TM4SF20
AMEXTC-0340000246082-acsl5	0	0.197682	0.157	0.055	0	META	AMEXTC-0340000246082-acsl5
AMEXTC-0340000058553-MTTP	0	0.19083	0.16	0.059	0	META	AMEXTC-0340000058553-MTTP
AMEXTC-0340000242856-ucp2	0	0.19052	0.223	0.129	0	META	AMEXTC-0340000242856-ucp2
AMEXTC-0340000167467-ferritin	0	0.183888	0.362	0.234	0	META	AMEXTC-0340000167467-ferritin
AMEXTC-0340000049303-Transposon	0	0.181219	0.133	0.036	0	META	AMEXTC-0340000049303-Transposon
AMEXTC-0340000051609-CALB1	0	0.18041	0.086	0.023	0	META	AMEXTC-0340000051609-CALB1
AMEXTC-0340000067103-annexin	0	0.179855	0.169	0.064	0	META	AMEXTC-0340000067103-annexin
AMEXTC-0340000125618-gpt2.L	0	0.176253	0.165	0.064	0	META	AMEXTC-0340000125618-gpt2.L
AMEXTC-0340000122671-Keratin	0	0.167565	0.094	0.049	0	META	AMEXTC-0340000122671-Keratin
AMEXTC-0340000041451-ACE	0	0.16679	0.326	0.144	0	META	AMEXTC-0340000041451-ACE
AMEXTC-0340000060158-fructose-bisphosphate	0	0.161434	0.358	0.239	0	META	AMEXTC-0340000060158-fructose-bisphosphate
AMEXTC-0340000118775-LOC102447917	0	0.158795	0.16	0.074	0	META	AMEXTC-0340000118775-LOC102447917
AMEXTC-0340000065260-slc7a7.L	0	0.158481	0.111	0.03	0	META	AMEXTC-0340000065260-slc7a7.L
AMEXTC-0340000230028-LTA4H	0	0.156751	0.131	0.05	0	META	AMEXTC-0340000230028-LTA4H
AMEXTC-0340000260598-COL3A1	0	0.155605	0.057	0.025	0	META	AMEXTC-0340000260598-COL3A1
AMEXTC-0340000051143-LOC102456231	0	0.153459	0.139	0.059	0	META	AMEXTC-0340000051143-LOC102456231
AMEXTC-0340000163856-slc7a8	0	0.153404	0.114	0.033	0	META	AMEXTC-0340000163856-slc7a8
AMEXTC-0340000247423-RBM47	0	0.153079	0.149	0.063	0	META	AMEXTC-0340000247423-RBM47
AMEXTC-0340000036308-hypothetical	0	0.151693	0.074	0.024	0	META	AMEXTC-0340000036308-hypothetical
AMEXTC-0340000054747-dpp4.L-2	0	0.148585	0.132	0.045	0	META	AMEXTC-0340000054747-dpp4.L-2
AMEXTC-0340000182167-LOC104308871	0	0.147548	0.114	0.037	0	META	AMEXTC-0340000182167-LOC104308871
AMEXTC-0340000067996-LOC102462176	0	0.1455	0.108	0.03	0	META	AMEXTC-0340000067996-LOC102462176
AMEXTC-0340000249305-cd36.S	0	0.143762	0.127	0.049	0	META	AMEXTC-0340000249305-cd36.S
AMEXTC-0340000040424-IGFBP3	0	0.143616	0.083	0.009	0	META	AMEXTC-0340000040424-IGFBP3
AMEXTC-0340000030848-TMEM176B	0	0.141734	0.221	0.131	0	META	AMEXTC-0340000030848-TMEM176B
AMEXTC-0340000200965-GGT1	0	0.140385	0.082	0.018	0	META	AMEXTC-0340000200965-GGT1
AMEXTC-0340000022955-thioredoxin	0	0.139194	0.05	0.014	0	META	AMEXTC-0340000022955-thioredoxin
AMEXTC-0340000291869-idh2.L	0	0.138694	0.193	0.097	0	META	AMEXTC-0340000291869-idh2.L
mRNA00224	0	0.138627	0.065	0.015	0	META	mRNA00224
AMEXTC-0340000269275-transgelin-2	0	0.138337	0.228	0.125	0	META	AMEXTC-0340000269275-transgelin-2
AMEXTC-0340000001766-EPB41L3	0	0.137236	0.126	0.052	0	META	AMEXTC-0340000001766-EPB41L3
AMEXTC-0340000063888-xbp1	0	0.136366	0.176	0.096	0	META	AMEXTC-0340000063888-xbp1
AMEXTC-0340000124041-complement	0	0.135339	0.064	0.004	0	META	AMEXTC-0340000124041-complement
AMEXTC-0340000049024-LOC101872848	0	0.134768	0.086	0.016	0	META	AMEXTC-0340000049024-LOC101872848
AMEXTC-0340000224966-MGST1	0	0.133849	0.138	0.061	0	META	AMEXTC-0340000224966-MGST1
AMEXTC-0340000175205-SYNE3	0	0.133089	0.087	0.017	0	META	AMEXTC-0340000175205-SYNE3
AMEXTC-0340000293224-prdx6.S	0	0.132748	0.194	0.102	0	META	AMEXTC-0340000293224-prdx6.S
AMEXTC-0340000007089-LOC108793352	0	0.132283	0.058	0.003	0	META	AMEXTC-0340000007089-LOC108793352
AMEXTC-0340000160292-RNPEP	0	0.130358	0.115	0.047	0	META	AMEXTC-0340000160292-RNPEP
AMEXTC-0340000214460-LOC107726794	0	0.1298	0.147	0.07	0	META	AMEXTC-0340000214460-LOC107726794
AMEXTC-0340000059841-catalase	0	0.128584	0.138	0.066	0	META	AMEXTC-0340000059841-catalase
AMEXTC-0340000232189-TSTD1	0	0.128087	0.158	0.083	0	META	AMEXTC-0340000232189-TSTD1
AMEXTC-0340000212179-DNAJC13	0	0.125769	0.112	0.041	0	META	AMEXTC-0340000212179-DNAJC13
AMEXTC-0340000011035-abcc2	0	0.12471	0.083	0.017	0	META	AMEXTC-0340000011035-abcc2
AMEXTC-0340000036978-XDH	0	0.123965	0.084	0.018	0	META	AMEXTC-0340000036978-XDH
AMEXTC-0340000051488-ADIPOR2	0	0.120011	0.112	0.045	0	META	AMEXTC-0340000051488-ADIPOR2
AMEXTC-0340000058787-LOC106732794	0	0.11756	0.101	0.034	0	META	AMEXTC-0340000058787-LOC106732794
AMEXTC-0340000167835-PNP	0	0.115084	0.076	0.018	0	META	AMEXTC-0340000167835-PNP
AMEXTC-0340000044443-g6pc2.S	0	0.111709	0.071	0.019	0	META	AMEXTC-0340000044443-g6pc2.S
AMEXTC-0340000273753-ndrg1	0	0.111046	0.099	0.042	0	META	AMEXTC-0340000273753-ndrg1
AMEXTC-0340000263317-dhrs4	0	0.11096	0.128	0.063	0	META	AMEXTC-0340000263317-dhrs4
AMEXTC-0340000192572-MEP1B	0	0.107845	0.136	0.066	0	META	AMEXTC-0340000192572-MEP1B
AMEXTC-0340000012024-LOC102576344	0	0.106219	0.097	0.043	0	META	AMEXTC-0340000012024-LOC102576344
AMEXTC-0340000056990-aquaporin	0	0.105409	0.167	0.107	0	META	AMEXTC-0340000056990-aquaporin
AMEXTC-0340000042262-RAC2	0	0.104687	0.09	0.03	0	META	AMEXTC-0340000042262-RAC2
AMEXTC-0340000131170-CYSTM1	0	0.103761	0.096	0.04	0	META	AMEXTC-0340000131170-CYSTM1
AMEXTC-0340000019594-atp1a1.L	0	0.103675	0.137	0.071	0	META	AMEXTC-0340000019594-atp1a1.L
AMEXTC-0340000153703-NCOA4	0	0.103419	0.124	0.067	0	META	AMEXTC-0340000153703-NCOA4
AMEXTC-0340000236661-anxa4	0	0.101593	0.165	0.096	0	META	AMEXTC-0340000236661-anxa4
AMEXTC-0340000161477-ppib	0	0.100517	0.139	0.076	0	META	AMEXTC-0340000161477-ppib
AMEXTC-0340000060732-LOC104484772	1.87e-170	0.548123	0.209	0.287	3.56e-166	META	AMEXTC-0340000060732-LOC104484772
AMEXTC-0340000279815-hypothetical	4.79e-89	0.214035	0.068	0.048	9.1e-85	META	AMEXTC-0340000279815-hypothetical
AMEXTC-0340000067976-LOC107584241	4.75e-60	0.19343	0.079	0.061	9.03e-56	META	AMEXTC-0340000067976-LOC107584241
AMEXTC-0340000026762-LOC102796035	8.94e-50	0.529633	0.25	0.242	1.7e-45	META	AMEXTC-0340000026762-LOC102796035
AMEXTC-0340000040950-ferritin	5.24e-47	0.179989	0.864	0.934	9.96e-43	META	AMEXTC-0340000040950-ferritin
AMEXTC-0340000061966-LOC108797350	5.31e-15	0.786723	0.199	0.231	1.01e-10	META	AMEXTC-0340000061966-LOC108797350
AMEXTC-0340000053619-KRT4	0	1.70103	0.78	0.238	0	WT	AMEXTC-0340000053619-KRT4
AMEXTC-0340000015355-LOC104614514	0	1.65934	0.784	0.235	0	WT	AMEXTC-0340000015355-LOC104614514
AMEXTC-0340000045453-LOC102566338	0	1.52822	0.807	0.236	0	WT	AMEXTC-0340000045453-LOC102566338
AMEXTC-0340000067538-antifreeze	0	1.06848	0.789	0.458	0	WT	AMEXTC-0340000067538-antifreeze
AMEXTC-0340000003827-alpha-keratin	0	0.954877	0.477	0.349	0	WT	AMEXTC-0340000003827-alpha-keratin
AMEXTC-0340000064524-keratin	0	0.762524	0.435	0.177	0	WT	AMEXTC-0340000064524-keratin
AMEXTC-0340000062861-LOC102446471	0	0.661535	0.409	0.213	0	WT	AMEXTC-0340000062861-LOC102446471
AMEXTC-0340000053557-keratin	0	0.633682	0.357	0.147	0	WT	AMEXTC-0340000053557-keratin
AMEXTC-0340000061995-RNA-binding	0	0.628185	0.84	0.752	0	WT	AMEXTC-0340000061995-RNA-binding
AMEXTC-0340000065826-LOC108700425	0	0.555005	0.378	0.187	0	WT	AMEXTC-0340000065826-LOC108700425
AMEXTC-0340000059978-EEF1A1	0	0.511972	0.952	0.9	0	WT	AMEXTC-0340000059978-EEF1A1
AMEXTC-0340000171595-ywhaq	0	0.47398	0.672	0.59	0	WT	AMEXTC-0340000171595-ywhaq
AMEXTC-0340000067429-LOC110077729	0	0.445321	0.396	0.24	0	WT	AMEXTC-0340000067429-LOC110077729
AMEXTC-0340000196671-LOC102362757	0	0.440516	0.256	0.135	0	WT	AMEXTC-0340000196671-LOC102362757
AMEXTC-0340000147566-RPL13	0	0.433224	0.609	0.54	0	WT	AMEXTC-0340000147566-RPL13
AMEXTC-0340000060912-DBF4B	0	0.40389	0.564	0.525	0	WT	AMEXTC-0340000060912-DBF4B
AMEXTC-0340000157709-LOC106904245	0	0.395838	0.707	0.685	0	WT	AMEXTC-0340000157709-LOC106904245
AMEXTC-0340000061107-LOC105922587	0	0.376934	0.303	0.169	0	WT	AMEXTC-0340000061107-LOC105922587
AMEXTC-0340000236745-rpl21	0	0.367277	0.364	0.257	0	WT	AMEXTC-0340000236745-rpl21
AMEXTC-0340000174773-rpl24	0	0.367169	0.387	0.325	0	WT	AMEXTC-0340000174773-rpl24
AMEXTC-0340000268759-RPL7	0	0.352056	0.51	0.466	0	WT	AMEXTC-0340000268759-RPL7
AMEXTC-0340000049484-rps27a	0	0.344899	0.52	0.451	0	WT	AMEXTC-0340000049484-rps27a
AMEXTC-0340000012285-APOA4	0	0.343184	0.091	0.155	0	WT	AMEXTC-0340000012285-APOA4
AMEXTC-0340000135861-RPL13A	0	0.32835	0.41	0.327	0	WT	AMEXTC-0340000135861-RPL13A
AMEXTC-0340000193751-RPS18	0	0.323457	0.268	0.172	0	WT	AMEXTC-0340000193751-RPS18
AMEXTC-0340000160430-LGALS3	0	0.31246	0.256	0.158	0	WT	AMEXTC-0340000160430-LGALS3
AMEXTC-0340000055894-RPL4	0	0.2925	0.46	0.401	0	WT	AMEXTC-0340000055894-RPL4
AMEXTC-0340000018468-EVPL	0	0.286782	0.179	0.098	0	WT	AMEXTC-0340000018468-EVPL
AMEXTC-0340000031085-p26olf	0	0.283292	0.48	0.416	0	WT	AMEXTC-0340000031085-p26olf
AMEXTC-0340000068016-anxa1	0	0.275796	0.308	0.238	0	WT	AMEXTC-0340000068016-anxa1
AMEXTC-0340000036435-hypothetical	0	0.273494	0.135	0.067	0	WT	AMEXTC-0340000036435-hypothetical
AMEXTC-0340000179189-perp.S	0	0.249363	0.326	0.253	0	WT	AMEXTC-0340000179189-perp.S
AMEXTC-0340000288656-CAPG	0	0.249096	0.27	0.196	0	WT	AMEXTC-0340000288656-CAPG
AMEXTC-0340000052193-LOC100021259	0	0.243902	0.148	0.071	0	WT	AMEXTC-0340000052193-LOC100021259
AMEXTC-0340000039332-LOC103180280	0	0.227709	0.116	0.04	0	WT	AMEXTC-0340000039332-LOC103180280
AMEXTC-0340000014162-LOC107078100	0	0.223803	0.227	0.145	0	WT	AMEXTC-0340000014162-LOC107078100
AMEXTC-0340000065510-LOC105862709	0	0.202732	0.096	0.043	0	WT	AMEXTC-0340000065510-LOC105862709
AMEXTC-0340000007155-LOC101947369	0	0.189673	0.081	0.034	0	WT	AMEXTC-0340000007155-LOC101947369
AMEXTC-0340000176076-LOC108793352	0	0.187951	0.094	0.039	0	WT	AMEXTC-0340000176076-LOC108793352
AMEXTC-0340000053057-SCEL	0	0.18337	0.152	0.09	0	WT	AMEXTC-0340000053057-SCEL
AMEXTC-0340000062192-CAPN9	0	0.180582	0.126	0.065	0	WT	AMEXTC-0340000062192-CAPN9
AMEXTC-0340000059764-LOC109925178	0	0.178355	0.092	0.04	0	WT	AMEXTC-0340000059764-LOC109925178
AMEXTC-0340000084578-LOC106605384	0	0.174028	0.109	0.053	0	WT	AMEXTC-0340000084578-LOC106605384
AMEXTC-0340000060430-LOC110088292	0	0.173515	0.124	0.065	0	WT	AMEXTC-0340000060430-LOC110088292
AMEXTC-0340000054221-tkt.L	0	0.14907	0.072	0.021	0	WT	AMEXTC-0340000054221-tkt.L
AMEXTC-0340000260737-upk1a.L	0	0.147773	0.083	0.031	0	WT	AMEXTC-0340000260737-upk1a.L
AMEXTC-0340000022287-AGR2	0	0.147007	0.102	0.044	0	WT	AMEXTC-0340000022287-AGR2
AMEXTC-0340000046231-MFAP2	0	0.129888	0.061	0.021	0	WT	AMEXTC-0340000046231-MFAP2
AMEXTC-0340000057237-Pebp1	0	0.127176	0.08	0.035	0	WT	AMEXTC-0340000057237-Pebp1
AMEXTC-0340000070693-rps8	0	0.126007	0.113	0.056	0	WT	AMEXTC-0340000070693-rps8
AMEXTC-0340000059501-RPL8	2.45e-299	0.320688	0.546	0.509	4.65e-295	WT	AMEXTC-0340000059501-RPL8
AMEXTC-0340000266533-RPL31	5.63e-287	0.25797	0.354	0.288	1.07e-282	WT	AMEXTC-0340000266533-RPL31
AMEXTC-0340000129040-SRI	2.72e-280	0.242267	0.303	0.238	5.16e-276	WT	AMEXTC-0340000129040-SRI
AMEXTC-0340000249940-rpl18.L	7.1e-278	0.251238	0.324	0.259	1.35e-273	WT	AMEXTC-0340000249940-rpl18.L
AMEXTC-0340000140651-mvp.L	4.66e-275	0.270929	0.416	0.358	8.86e-271	WT	AMEXTC-0340000140651-mvp.L
AMEXTC-0340000024435-otog.L	2.98e-269	0.125238	0.078	0.037	5.67e-265	WT	AMEXTC-0340000024435-otog.L
AMEXTC-0340000118210-unnamed	4.83e-269	0.111006	0.06	0.024	9.18e-265	WT	AMEXTC-0340000118210-unnamed
AMEXTC-0340000063672-rhbdf1	3.31e-266	0.237707	0.17	0.115	6.29e-262	WT	AMEXTC-0340000063672-rhbdf1
AMEXTC-0340000051319-LOC102939947	4.99e-258	0.111038	0.08	0.039	9.47e-254	WT	AMEXTC-0340000051319-LOC102939947
AMEXTC-0340000054181-arrdc2	9.79e-256	0.209353	0.128	0.079	1.86e-251	WT	AMEXTC-0340000054181-arrdc2
AMEXTC-0340000281105-LOC101605408	8.44e-246	0.225251	0.372	0.312	1.6e-241	WT	AMEXTC-0340000281105-LOC101605408
AMEXTC-0340000182972-RPL10A	2.34e-242	0.324021	0.49	0.451	4.44e-238	WT	AMEXTC-0340000182972-RPL10A
AMEXTC-0340000026147-PPL	8.11e-238	0.138748	0.108	0.063	1.54e-233	WT	AMEXTC-0340000026147-PPL
AMEXTC-0340000185882-ANXA1	3.85e-230	0.185396	0.312	0.246	7.31e-226	WT	AMEXTC-0340000185882-ANXA1
mRNA01206	5.91e-230	0.303454	0.403	0.357	1.12e-225	WT	mRNA01206
AMEXTC-0340000222640-APH1A	1.08e-224	0.272625	0.478	0.436	2.05e-220	WT	AMEXTC-0340000222640-APH1A
AMEXTC-0340000003433-txnrd1.L	7.21e-222	0.133481	0.099	0.058	1.37e-217	WT	AMEXTC-0340000003433-txnrd1.L
AMEXTC-0340000003048-LOC108696889	1.54e-218	0.165161	0.08	0.043	2.93e-214	WT	AMEXTC-0340000003048-LOC108696889
AMEXTC-0340000033862-HSP90AB1	2.63e-215	0.304174	0.624	0.613	5e-211	WT	AMEXTC-0340000033862-HSP90AB1
AMEXTC-0340000195029-RPL7A	7.59e-208	0.2867	0.529	0.496	1.44e-203	WT	AMEXTC-0340000195029-RPL7A
AMEXTC-0340000155453-jup	2.32e-203	0.22025	0.23	0.178	4.41e-199	WT	AMEXTC-0340000155453-jup
AMEXTC-0340000020164-SERPINB5	7.34e-199	0.170396	0.176	0.126	1.39e-194	WT	AMEXTC-0340000020164-SERPINB5
AMEXTC-0340000136685-TREX2	6.02e-197	0.240982	0.209	0.161	1.14e-192	WT	AMEXTC-0340000136685-TREX2
AMEXTC-0340000015153-LOC106606887	3.92e-189	0.164837	0.101	0.062	7.45e-185	WT	AMEXTC-0340000015153-LOC106606887
AMEXTC-0340000070910-LOC100337691	2.85e-186	0.186645	0.288	0.235	5.41e-182	WT	AMEXTC-0340000070910-LOC100337691
AMEXTC-0340000250610-hypothetical	9.59e-179	0.269486	0.476	0.446	1.82e-174	WT	AMEXTC-0340000250610-hypothetical
AMEXTC-0340000067721-RPS11	5.55e-164	0.181847	0.246	0.199	1.05e-159	WT	AMEXTC-0340000067721-RPS11
AMEXTC-0340000139860-RPS6	7.55e-162	0.314849	0.498	0.473	1.43e-157	WT	AMEXTC-0340000139860-RPS6
AMEXTC-0340000056442-capns1	1.15e-158	0.177151	0.195	0.15	2.18e-154	WT	AMEXTC-0340000056442-capns1
AMEXTC-0340000217685-GLO1	8.4e-156	0.138774	0.104	0.069	1.6e-151	WT	AMEXTC-0340000217685-GLO1
AMEXTC-0340000063717-PRDX5	2.99e-139	0.161924	0.234	0.191	5.68e-135	WT	AMEXTC-0340000063717-PRDX5
AMEXTC-0340000034860-PDLIM2	6.05e-131	0.110712	0.075	0.047	1.15e-126	WT	AMEXTC-0340000034860-PDLIM2
AMEXTC-0340000067195-LOC106904245	4.1e-125	0.182762	0.2	0.162	7.8e-121	WT	AMEXTC-0340000067195-LOC106904245
AMEXTC-0340000022844-AHNAK2	3.25e-121	0.128067	0.084	0.056	6.18e-117	WT	AMEXTC-0340000022844-AHNAK2
AMEXTC-0340000207067-rps5	2.71e-118	0.124682	0.338	0.296	5.14e-114	WT	AMEXTC-0340000207067-rps5
AMEXTC-0340000131392-LOC107084780	3.29e-115	0.222641	0.521	0.507	6.26e-111	WT	AMEXTC-0340000131392-LOC107084780
AMEXTC-0340000179322-TPT1	2.76e-113	0.292796	0.426	0.41	5.25e-109	WT	AMEXTC-0340000179322-TPT1
AMEXTC-0340000069732-RPS10	1.65e-110	0.11229	0.214	0.176	3.14e-106	WT	AMEXTC-0340000069732-RPS10
AMEXTC-0340000237973-RPS10	4.51e-105	0.109548	0.207	0.17	8.56e-101	WT	AMEXTC-0340000237973-RPS10
AMEXTC-0340000051107-hypothetical	4.18e-104	0.197635	0.496	0.477	7.94e-100	WT	AMEXTC-0340000051107-hypothetical
AMEXTC-0340000050527-eef1b2.L	5.94e-97	0.153895	0.324	0.29	1.13e-92	WT	AMEXTC-0340000050527-eef1b2.L
AMEXTC-0340000052250-LOC101797289	4.91e-92	0.158019	0.147	0.117	9.33e-88	WT	AMEXTC-0340000052250-LOC101797289
AMEXTC-0340000065047-rplp0.L	9.12e-91	0.21287	0.375	0.351	1.73e-86	WT	AMEXTC-0340000065047-rplp0.L
AMEXTC-0340000067981-RPL6	2.07e-89	0.245489	0.433	0.414	3.93e-85	WT	AMEXTC-0340000067981-RPL6
AMEXTC-0340000029609-EIF5A	1.62e-85	0.240798	0.46	0.451	3.07e-81	WT	AMEXTC-0340000029609-EIF5A
AMEXTC-0340000060653-LOC100917284	1.8e-85	0.156771	0.187	0.156	3.41e-81	WT	AMEXTC-0340000060653-LOC100917284
AMEXTC-0340000248529-LOC100496749	1.46e-84	0.158699	0.291	0.257	2.78e-80	WT	AMEXTC-0340000248529-LOC100496749
AMEXTC-0340000001305-LOC109138802	2.4e-83	0.117384	0.145	0.116	4.56e-79	WT	AMEXTC-0340000001305-LOC109138802
AMEXTC-0340000057479-LOC109985838	3.7e-83	0.102911	0.129	0.102	7.02e-79	WT	AMEXTC-0340000057479-LOC109985838
AMEXTC-0340000015502-LOC108787608	6.11e-78	0.11142	0.133	0.105	1.16e-73	WT	AMEXTC-0340000015502-LOC108787608
AMEXTC-0340000163059-SLC20A1	6.18e-77	0.170604	0.171	0.144	1.17e-72	WT	AMEXTC-0340000163059-SLC20A1
AMEXTC-0340000067522-Rps16-ps2	1.01e-76	0.20028	0.214	0.187	1.91e-72	WT	AMEXTC-0340000067522-Rps16-ps2
AMEXTC-0340000058158-LOC106738398	2.55e-75	0.121067	0.105	0.082	4.84e-71	WT	AMEXTC-0340000058158-LOC106738398
AMEXTC-0340000051333-hypothetical	8.57e-73	0.100951	0.073	0.053	1.63e-68	WT	AMEXTC-0340000051333-hypothetical
AMEXTC-0340000256869-LOC100494403	4.37e-66	0.179541	0.396	0.378	8.29e-62	WT	AMEXTC-0340000256869-LOC100494403
AMEXTC-0340000039298-lamb3	2.5e-60	0.110837	0.075	0.057	4.76e-56	WT	AMEXTC-0340000039298-lamb3
AMEXTC-0340000174606-spint2	1.15e-58	0.147988	0.159	0.136	2.17e-54	WT	AMEXTC-0340000174606-spint2
AMEXTC-0340000149000-Rpl11	4.2e-56	0.195496	0.322	0.303	7.98e-52	WT	AMEXTC-0340000149000-Rpl11
AMEXTC-0340000050539-pmp2.S	1.17e-52	0.127244	0.138	0.116	2.22e-48	WT	AMEXTC-0340000050539-pmp2.S
AMEXTC-0340000139919-RPL5	8.81e-52	0.181989	0.32	0.302	1.67e-47	WT	AMEXTC-0340000139919-RPL5
AMEXTC-0340000023902-DSG2	2.77e-50	0.127647	0.138	0.117	5.25e-46	WT	AMEXTC-0340000023902-DSG2
AMEXTC-0340000061036-protein	2.62e-49	0.212623	0.548	0.562	4.98e-45	WT	AMEXTC-0340000061036-protein
AMEXTC-0340000066526-RPL17	1.77e-47	0.221762	0.326	0.314	3.37e-43	WT	AMEXTC-0340000066526-RPL17
AMEXTC-0340000039309-hypothetical	5.12e-47	0.104612	0.331	0.309	9.72e-43	WT	AMEXTC-0340000039309-hypothetical
AMEXTC-0340000048324-LOC102698167	4.11e-46	0.130345	0.226	0.204	7.81e-42	WT	AMEXTC-0340000048324-LOC102698167
AMEXTC-0340000137289-ENO1	9.64e-46	0.114794	0.192	0.17	1.83e-41	WT	AMEXTC-0340000137289-ENO1
AMEXTC-0340000066582-hypothetical	2.52e-45	0.102697	0.109	0.09	4.78e-41	WT	AMEXTC-0340000066582-hypothetical
AMEXTC-0340000053070-RPL10	2.18e-41	0.197747	0.491	0.495	4.13e-37	WT	AMEXTC-0340000053070-RPL10
AMEXTC-0340000283972-Eif3g	5.3e-41	0.107398	0.123	0.105	1.01e-36	WT	AMEXTC-0340000283972-Eif3g
AMEXTC-0340000232945-tuba1a.L	1.08e-39	0.133973	0.192	0.173	2.06e-35	WT	AMEXTC-0340000232945-tuba1a.L
AMEXTC-0340000017630-zgc:153867	1.36e-39	0.119941	0.218	0.198	2.59e-35	WT	AMEXTC-0340000017630-zgc:153867
AMEXTC-0340000056469-Y	1.71e-38	0.229128	0.444	0.447	3.26e-34	WT	AMEXTC-0340000056469-Y
AMEXTC-0340000070761-LOC100361457	6.92e-37	0.11883	0.15	0.132	1.31e-32	WT	AMEXTC-0340000070761-LOC100361457
AMEXTC-0340000070861-RPL27A	1.5e-35	0.144847	0.269	0.252	2.84e-31	WT	AMEXTC-0340000070861-RPL27A
AMEXTC-0340000180240-ywhab.L	4.26e-35	0.103765	0.184	0.165	8.1e-31	WT	AMEXTC-0340000180240-ywhab.L
AMEXTC-0340000066447-LOC103234934	3.35e-34	0.184093	0.487	0.49	6.37e-30	WT	AMEXTC-0340000066447-LOC103234934
AMEXTC-0340000124422-LOC101945345	1.68e-32	0.101023	0.184	0.167	3.19e-28	WT	AMEXTC-0340000124422-LOC101945345
AMEXTC-0340000064717-ahcy	1.35e-30	0.148351	0.208	0.193	2.56e-26	WT	AMEXTC-0340000064717-ahcy
AMEXTC-0340000135282-rps2	9.25e-30	0.206597	0.595	0.625	1.76e-25	WT	AMEXTC-0340000135282-rps2
AMEXTC-0340000267509-NFKBIA	8.45e-29	0.171337	0.267	0.253	1.6e-24	WT	AMEXTC-0340000267509-NFKBIA
AMEXTC-0340000067197-rps28p9	7.79e-26	0.171449	0.266	0.255	1.48e-21	WT	AMEXTC-0340000067197-rps28p9
AMEXTC-0340000052377-voltage-dependent	4.89e-25	0.123141	0.275	0.262	9.28e-21	WT	AMEXTC-0340000052377-voltage-dependent
AMEXTC-0340000122146-DDIT4	3.56e-24	0.100772	0.089	0.077	6.76e-20	WT	AMEXTC-0340000122146-DDIT4
AMEXTC-0340000148294-RACK1	3.22e-23	0.136728	0.439	0.439	6.12e-19	WT	AMEXTC-0340000148294-RACK1
AMEXTC-0340000122827-LOC104929377	7.52e-19	0.121468	0.291	0.284	1.43e-14	WT	AMEXTC-0340000122827-LOC104929377
AMEXTC-0340000221012-GOLGA2	1.72e-17	0.101215	0.129	0.119	3.27e-13	WT	AMEXTC-0340000221012-GOLGA2
AMEXTC-0340000042284-LOC109085819	1.02e-16	0.104443	0.131	0.121	1.94e-12	WT	AMEXTC-0340000042284-LOC109085819
AMEXTC-0340000202253-cldn7.L	1.47e-16	0.114161	0.227	0.252	2.8e-12	WT	AMEXTC-0340000202253-cldn7.L
AMEXTC-0340000281118-glyceraldehyde	6.61e-16	0.134709	0.378	0.378	1.26e-11	WT	AMEXTC-0340000281118-glyceraldehyde
AMEXTC-0340000062113-SLC25A3	2.24e-14	0.162366	0.393	0.397	4.25e-10	WT	AMEXTC-0340000062113-SLC25A3
AMEXTC-0340000056997-HNRNPK	6.02e-13	0.136172	0.28	0.276	1.14e-08	WT	AMEXTC-0340000056997-HNRNPK
AMEXTC-0340000060391-ncl.S	1.38e-07	0.115749	0.334	0.362	0.00262322	WT	AMEXTC-0340000060391-ncl.S
AMEXTC-0340000227252-rpsa.S	2.49e-06	0.104527	0.34	0.34	0.0472656	WT	AMEXTC-0340000227252-rpsa.S
AMEXTC-0340000226440-SET	2.73e-06	0.122988	0.255	0.255	0.0518392	WT	AMEXTC-0340000226440-SET
AMEXTC-0340000067483-LOC106589173	2.09e-05	0.159349	0.293	0.297	0.397508	WT	AMEXTC-0340000067483-LOC106589173
AMEXTC-0340000059242-DUSP1	0.000372839	0.12661	0.313	0.317	1	WT	AMEXTC-0340000059242-DUSP1
AMEXTC-0340000042579-olfm4	0.000854117	0.380546	0.052	0.056	1	WT	AMEXTC-0340000042579-olfm4
AMEXTC-0340000032501-RPL23	0.00226922	0.14332	0.324	0.331	1	WT	AMEXTC-0340000032501-RPL23
AMEXTC-0340000152570-gpa33.L	0.00810182	0.140259	0.248	0.253	1	WT	AMEXTC-0340000152570-gpa33.L

## Sheet: DEGs_Muscle_cells
	p_val	avg_log2FC	pct.1	pct.2	p_val_adj	cluster	gene
AMEXTC-0340000023242-collagen	6.09e-98	0.990005	0.913	0.607	1.16e-93	META	AMEXTC-0340000023242-collagen
mRNA00035	2.7e-94	1.59229	0.658	0.379	5.13e-90	META	mRNA00035
AMEXTC-0340000117374-acta2	7.04e-90	1.07045	0.838	0.599	1.34e-85	META	AMEXTC-0340000117374-acta2
AMEXTC-0340000004704-TAGLN	4.04e-89	0.765215	0.79	0.454	7.67e-85	META	AMEXTC-0340000004704-TAGLN
AMEXTC-0340000044071-FBN1	4.7e-88	0.810735	0.498	0.197	8.94e-84	META	AMEXTC-0340000044071-FBN1
AMEXTC-0340000030214-rgs5	8.23e-82	0.858991	0.31	0.091	1.56e-77	META	AMEXTC-0340000030214-rgs5
AMEXTC-0340000279815-hypothetical	1.46e-78	1.0248	0.857	0.573	2.78e-74	META	AMEXTC-0340000279815-hypothetical
AMEXTC-0340000220768-MYH11	2.42e-78	0.688757	0.441	0.167	4.59e-74	META	AMEXTC-0340000220768-MYH11
mRNA00052	3.48e-73	1.27429	0.067	0.001	6.6e-69	META	mRNA00052
AMEXTC-0340000020325-CNN1	4.39e-72	0.539205	0.384	0.134	8.34e-68	META	AMEXTC-0340000020325-CNN1
AMEXTC-0340000034893-FBLN5	1.24e-67	0.562918	0.402	0.152	2.35e-63	META	AMEXTC-0340000034893-FBLN5
AMEXTC-0340000014615-FN1	9.99e-60	0.459278	0.289	0.095	1.9e-55	META	AMEXTC-0340000014615-FN1
AMEXTC-0340000061259-myosin	5.3e-59	0.540467	0.599	0.302	1.01e-54	META	AMEXTC-0340000061259-myosin
AMEXTC-0340000058146-HTRA1	2.91e-56	0.339496	0.216	0.059	5.53e-52	META	AMEXTC-0340000058146-HTRA1
AMEXTC-0340000051295-CTGF	3.42e-56	0.339432	0.174	0.039	6.49e-52	META	AMEXTC-0340000051295-CTGF
AMEXTC-0340000063844-CSRP1	3.46e-56	0.540635	0.486	0.234	6.58e-52	META	AMEXTC-0340000063844-CSRP1
AMEXTC-0340000042814-COL5A2	1.55e-53	0.492328	0.547	0.28	2.94e-49	META	AMEXTC-0340000042814-COL5A2
AMEXTC-0340000260598-COL3A1	3.82e-51	0.71276	0.846	0.6	7.25e-47	META	AMEXTC-0340000260598-COL3A1
AMEXTC-0340000008387-sparc.S	1.6e-48	0.5345	0.826	0.567	3.03e-44	META	AMEXTC-0340000008387-sparc.S
AMEXTC-0340000173995-CALD1	1.02e-46	0.353355	0.505	0.256	1.93e-42	META	AMEXTC-0340000173995-CALD1
AMEXTC-0340000029285-MMP2	1.4e-46	0.391642	0.295	0.115	2.66e-42	META	AMEXTC-0340000029285-MMP2
AMEXTC-0340000055782-serpinf1	5.86e-45	0.308867	0.176	0.048	1.11e-40	META	AMEXTC-0340000055782-serpinf1
AMEXTC-0340000051680-beta-actin	1.91e-44	0.554962	0.634	0.404	3.62e-40	META	AMEXTC-0340000051680-beta-actin
AMEXTC-0340000046231-MFAP2	2.09e-42	0.393708	0.355	0.16	3.98e-38	META	AMEXTC-0340000046231-MFAP2
AMEXTC-0340000025293-OLFML2B	5.93e-42	0.195191	0.115	0.023	1.13e-37	META	AMEXTC-0340000025293-OLFML2B
AMEXTC-0340000152531-MCAM	1.23e-41	0.256645	0.165	0.046	2.33e-37	META	AMEXTC-0340000152531-MCAM
AMEXTC-0340000160732-tissue	4.05e-40	0.290339	0.181	0.055	7.7e-36	META	AMEXTC-0340000160732-tissue
AMEXTC-0340000186359-FSTL1	8.68e-39	0.411561	0.654	0.401	1.65e-34	META	AMEXTC-0340000186359-FSTL1
AMEXTC-0340000057775-FHL1	1.02e-38	0.315925	0.294	0.124	1.95e-34	META	AMEXTC-0340000057775-FHL1
AMEXTC-0340000017574-NES	2.36e-36	0.361883	0.33	0.151	4.48e-32	META	AMEXTC-0340000017574-NES
AMEXTC-0340000038700-tropomyocin	4.45e-36	0.288613	0.36	0.174	8.45e-32	META	AMEXTC-0340000038700-tropomyocin
AMEXTC-0340000022994-MYH10	2.24e-35	0.323497	0.285	0.124	4.25e-31	META	AMEXTC-0340000022994-MYH10
AMEXTC-0340000031493-OGN	3.65e-34	0.317051	0.313	0.144	6.94e-30	META	AMEXTC-0340000031493-OGN
AMEXTC-0340000024582-C1QTNF1	3.34e-32	0.194946	0.105	0.025	6.34e-28	META	AMEXTC-0340000024582-C1QTNF1
AMEXTC-0340000033095-lmod1.S	7.35e-32	0.195444	0.159	0.052	1.4e-27	META	AMEXTC-0340000033095-lmod1.S
AMEXTC-0340000207707-thrombospondin-1	7.63e-32	0.254704	0.179	0.063	1.45e-27	META	AMEXTC-0340000207707-thrombospondin-1
AMEXTC-0340000170886-actg1.S	9.99e-32	0.24485	0.419	0.229	1.9e-27	META	AMEXTC-0340000170886-actg1.S
AMEXTC-0340000019271-LOC106674670	9.67e-31	0.280181	0.435	0.241	1.84e-26	META	AMEXTC-0340000019271-LOC106674670
AMEXTC-0340000136848-CALU	4.32e-30	0.241706	0.259	0.114	8.2e-26	META	AMEXTC-0340000136848-CALU
AMEXTC-0340000266541-ITGB1	4.57e-30	0.325486	0.29	0.139	8.68e-26	META	AMEXTC-0340000266541-ITGB1
AMEXTC-0340000030471-LOC100075357	7.7e-30	0.184528	0.136	0.042	1.46e-25	META	AMEXTC-0340000030471-LOC100075357
AMEXTC-0340000055822-parva	1.38e-29	0.179344	0.169	0.06	2.62e-25	META	AMEXTC-0340000055822-parva
AMEXTC-0340000257024-cysteine-rich	1.87e-29	0.16135	0.21	0.083	3.55e-25	META	AMEXTC-0340000257024-cysteine-rich
AMEXTC-0340000021479-col12a1	2.4e-29	0.296895	0.324	0.162	4.56e-25	META	AMEXTC-0340000021479-col12a1
AMEXTC-0340000051494-LOC102929365	4.41e-29	0.259941	0.489	0.292	8.37e-25	META	AMEXTC-0340000051494-LOC102929365
AMEXTC-0340000077754-MATN2	7.33e-27	0.132536	0.105	0.028	1.39e-22	META	AMEXTC-0340000077754-MATN2
AMEXTC-0340000049825-dcn	8.18e-26	0.486999	0.284	0.148	1.55e-21	META	AMEXTC-0340000049825-dcn
AMEXTC-0340000007252-LTBP1	9.26e-26	0.228871	0.178	0.071	1.76e-21	META	AMEXTC-0340000007252-LTBP1
AMEXTC-0340000006923-LOC110090689	4.37e-25	0.126984	0.074	0.016	8.31e-21	META	AMEXTC-0340000006923-LOC110090689
AMEXTC-0340000010712-LSU	4.78e-25	0.26494	0.19	0.079	9.09e-21	META	AMEXTC-0340000010712-LSU
AMEXTC-0340000024830-Cav1	5.94e-25	0.245724	0.288	0.145	1.13e-20	META	AMEXTC-0340000024830-Cav1
AMEXTC-0340000002098-EHD2	6.35e-25	0.185151	0.212	0.092	1.21e-20	META	AMEXTC-0340000002098-EHD2
AMEXTC-0340000208399-MYLK	9.05e-25	0.199087	0.198	0.084	1.72e-20	META	AMEXTC-0340000208399-MYLK
AMEXTC-0340000060397-ABI3BP	6.51e-24	0.13492	0.066	0.013	1.24e-19	META	AMEXTC-0340000060397-ABI3BP
AMEXTC-0340000047511-col6a3	3.28e-23	0.16898	0.476	0.286	6.23e-19	META	AMEXTC-0340000047511-col6a3
AMEXTC-0340000017630-zgc:153867	5.23e-23	0.243031	0.448	0.275	9.94e-19	META	AMEXTC-0340000017630-zgc:153867
AMEXTC-0340000004428-lamb2	2.98e-22	0.164346	0.147	0.056	5.67e-18	META	AMEXTC-0340000004428-lamb2
AMEXTC-0340000045250-col4a2.S	6.38e-22	0.284976	0.256	0.132	1.21e-17	META	AMEXTC-0340000045250-col4a2.S
AMEXTC-0340000003132-flna	4.88e-21	0.21185	0.234	0.118	9.28e-17	META	AMEXTC-0340000003132-flna
AMEXTC-0340000185775-kcnmb1.L	1.4e-20	0.104909	0.069	0.017	2.66e-16	META	AMEXTC-0340000185775-kcnmb1.L
AMEXTC-0340000137798-major	2.74e-20	0.486517	0.222	0.113	5.21e-16	META	AMEXTC-0340000137798-major
AMEXTC-0340000246688-LOC104635543	3.73e-20	0.154185	0.494	0.318	7.08e-16	META	AMEXTC-0340000246688-LOC104635543
AMEXTC-0340000006533-LOC104635427	7.1e-20	0.226494	0.353	0.207	1.35e-15	META	AMEXTC-0340000006533-LOC104635427
AMEXTC-0340000028187-LOC110090180	8.24e-20	0.164527	0.099	0.033	1.57e-15	META	AMEXTC-0340000028187-LOC110090180
AMEXTC-0340000062036-BGN	9.53e-20	0.26839	0.394	0.242	1.81e-15	META	AMEXTC-0340000062036-BGN
AMEXTC-0340000006054-Mfap4	1.05e-19	0.213055	0.186	0.086	2e-15	META	AMEXTC-0340000006054-Mfap4
AMEXTC-0340000005238-LOC100486063	1.1e-19	0.165272	0.178	0.08	2.09e-15	META	AMEXTC-0340000005238-LOC100486063
AMEXTC-0340000175653-HMCN1	1.01e-18	0.129579	0.087	0.027	1.91e-14	META	AMEXTC-0340000175653-HMCN1
AMEXTC-0340000071836-beta-globin	1.16e-18	0.541712	0.2	0.101	2.2e-14	META	AMEXTC-0340000071836-beta-globin
AMEXTC-0340000213022-VCL	2.94e-18	0.155854	0.178	0.083	5.58e-14	META	AMEXTC-0340000213022-VCL
AMEXTC-0340000021595-EFEMP1	3.52e-18	0.180239	0.148	0.065	6.68e-14	META	AMEXTC-0340000021595-EFEMP1
AMEXTC-0340000039804-synapse	1.04e-17	0.159389	0.239	0.126	1.97e-13	META	AMEXTC-0340000039804-synapse
AMEXTC-0340000014060-timp2	2.97e-17	0.146944	0.149	0.067	5.64e-13	META	AMEXTC-0340000014060-timp2
AMEXTC-0340000006793-LOC102933104	4.8e-17	0.103646	0.058	0.014	9.12e-13	META	AMEXTC-0340000006793-LOC102933104
AMEXTC-0340000006360-SORBS1	1.21e-16	0.126344	0.13	0.055	2.3e-12	META	AMEXTC-0340000006360-SORBS1
AMEXTC-0340000019121-tgfbi	1.8e-16	0.116797	0.07	0.021	3.41e-12	META	AMEXTC-0340000019121-tgfbi
AMEXTC-0340000137278-ANXA1	3.33e-16	0.176409	0.262	0.15	6.33e-12	META	AMEXTC-0340000137278-ANXA1
AMEXTC-0340000042086-NDRG4	4.05e-16	0.146114	0.108	0.043	7.7e-12	META	AMEXTC-0340000042086-NDRG4
AMEXTC-0340000016188-LOC108698608	4.37e-16	0.137608	0.319	0.189	8.3e-12	META	AMEXTC-0340000016188-LOC108698608
AMEXTC-0340000161639-RSU1	5.23e-16	0.125953	0.086	0.03	9.93e-12	META	AMEXTC-0340000161639-RSU1
AMEXTC-0340000051589-COL11A1	5.87e-16	0.111085	0.05	0.012	1.12e-11	META	AMEXTC-0340000051589-COL11A1
AMEXTC-0340000017526-LOC100494719	7.28e-16	0.132535	0.203	0.105	1.38e-11	META	AMEXTC-0340000017526-LOC100494719
AMEXTC-0340000004663-CFL2	1.05e-15	0.158395	0.192	0.098	1.99e-11	META	AMEXTC-0340000004663-CFL2
AMEXTC-0340000191180-pdlim7	1.14e-15	0.120825	0.129	0.056	2.17e-11	META	AMEXTC-0340000191180-pdlim7
AMEXTC-0340000036994-emilin1.L	8.29e-15	0.120827	0.178	0.091	1.58e-10	META	AMEXTC-0340000036994-emilin1.L
AMEXTC-0340000269275-transgelin-2	1.04e-14	0.130066	0.441	0.297	1.97e-10	META	AMEXTC-0340000269275-transgelin-2
AMEXTC-0340000177554-CUNH9orf3	4.08e-14	0.127754	0.086	0.032	7.74e-10	META	AMEXTC-0340000177554-CUNH9orf3
AMEXTC-0340000047873-MSN	2.96e-13	0.128677	0.201	0.112	5.61e-09	META	AMEXTC-0340000047873-MSN
AMEXTC-0340000003731-LOC108791711	3.21e-13	0.204458	0.315	0.207	6.1e-09	META	AMEXTC-0340000003731-LOC108791711
AMEXTC-0340000248529-LOC100496749	3.48e-13	0.142878	0.396	0.266	6.62e-09	META	AMEXTC-0340000248529-LOC100496749
AMEXTC-0340000125964-EF-hand	4.32e-13	0.104433	0.087	0.034	8.2e-09	META	AMEXTC-0340000125964-EF-hand
AMEXTC-0340000294788-RBPMS2	5.16e-13	0.106378	0.148	0.074	9.8e-09	META	AMEXTC-0340000294788-RBPMS2
AMEXTC-0340000031086-LOC102929857	8.13e-13	0.113968	0.093	0.038	1.54e-08	META	AMEXTC-0340000031086-LOC102929857
AMEXTC-0340000018024-MFAP5	5.34e-12	0.316833	0.118	0.057	1.01e-07	META	AMEXTC-0340000018024-MFAP5
mRNA01083	9.52e-12	0.131017	0.251	0.154	1.81e-07	META	mRNA01083
AMEXTC-0340000009730-CTHRC1	3.06e-11	0.101466	0.094	0.042	5.82e-07	META	AMEXTC-0340000009730-CTHRC1
AMEXTC-0340000020850-EFEMP2	1.35e-10	0.101528	0.094	0.043	2.57e-06	META	AMEXTC-0340000020850-EFEMP2
AMEXTC-0340000058323-keratin	7.14e-10	0.10853	0.052	0.019	1.36e-05	META	AMEXTC-0340000058323-keratin
AMEXTC-0340000161883-atp2a3	2.07e-09	0.156236	0.061	0.025	3.93e-05	META	AMEXTC-0340000161883-atp2a3
AMEXTC-0340000069295-minor	1.11e-08	0.359252	0.169	0.107	0.000211293	META	AMEXTC-0340000069295-minor
AMEXTC-0340000070102-beta	1.41e-08	0.453268	0.168	0.107	0.000268007	META	AMEXTC-0340000070102-beta
AMEXTC-0340000018570-THBS2	2.73e-08	0.113771	0.155	0.093	0.000519378	META	AMEXTC-0340000018570-THBS2
AMEXTC-0340000063538-LOC102946426	2.93e-08	0.128892	0.089	0.045	0.00055638	META	AMEXTC-0340000063538-LOC102946426
AMEXTC-0340000055751-LOC108789125	2.83e-07	0.106464	0.115	0.066	0.00537942	META	AMEXTC-0340000055751-LOC108789125
AMEXTC-0340000186287-OSR1	4.96e-07	0.109031	0.085	0.045	0.00942908	META	AMEXTC-0340000186287-OSR1
AMEXTC-0340000066569-histone	2.16e-06	0.143503	0.176	0.119	0.0410785	META	AMEXTC-0340000066569-histone
AMEXTC-0340000122671-Keratin	0.000684859	0.107302	0.064	0.039	1	META	AMEXTC-0340000122671-Keratin
AMEXTC-0340000045453-LOC102566338	3.6e-117	2.70449	0.421	0.01	6.85e-113	WT	AMEXTC-0340000045453-LOC102566338
AMEXTC-0340000015355-LOC104614514	9.4e-86	2.10187	0.346	0.017	1.78e-81	WT	AMEXTC-0340000015355-LOC104614514
AMEXTC-0340000053619-KRT4	8.57e-85	2.0608	0.328	0.007	1.63e-80	WT	AMEXTC-0340000053619-KRT4
AMEXTC-0340000059978-EEF1A1	1.68e-57	0.666216	0.935	0.846	3.19e-53	WT	AMEXTC-0340000059978-EEF1A1
AMEXTC-0340000067538-antifreeze	2.06e-30	1.00917	0.41	0.226	3.91e-26	WT	AMEXTC-0340000067538-antifreeze
AMEXTC-0340000061995-RNA-binding	3.45e-29	0.63832	0.653	0.516	6.56e-25	WT	AMEXTC-0340000061995-RNA-binding
AMEXTC-0340000040950-ferritin	2.05e-23	0.53339	0.897	0.794	3.89e-19	WT	AMEXTC-0340000040950-ferritin
AMEXTC-0340000023463-sodefrin	2.46e-22	2.51474	0.103	0.003	4.68e-18	WT	AMEXTC-0340000023463-sodefrin
AMEXTC-0340000006214-LOC101942353	4.1e-22	1.97104	0.102	0.003	7.79e-18	WT	AMEXTC-0340000006214-LOC101942353
AMEXTC-0340000022618-LOC106533029	5.12e-22	2.07417	0.102	0.003	9.73e-18	WT	AMEXTC-0340000022618-LOC106533029
AMEXTC-0340000018852-hypothetical	9.73e-21	0.368997	0.172	0.051	1.85e-16	WT	AMEXTC-0340000018852-hypothetical
AMEXTC-0340000083185-glul.L	1.59e-19	0.467767	0.099	0.008	3.02e-15	WT	AMEXTC-0340000083185-glul.L
AMEXTC-0340000196671-LOC102362757	4.52e-18	0.260673	0.093	0.008	8.59e-14	WT	AMEXTC-0340000196671-LOC102362757
AMEXTC-0340000062861-LOC102446471	7.03e-18	0.323589	0.086	0.004	1.33e-13	WT	AMEXTC-0340000062861-LOC102446471
AMEXTC-0340000014162-LOC107078100	4.05e-16	0.342668	0.072	0.001	7.69e-12	WT	AMEXTC-0340000014162-LOC107078100
AMEXTC-0340000147300-calr	5.58e-16	0.390436	0.171	0.069	1.06e-11	WT	AMEXTC-0340000147300-calr
AMEXTC-0340000061107-LOC105922587	1.09e-15	0.318627	0.074	0.003	2.07e-11	WT	AMEXTC-0340000061107-LOC105922587
AMEXTC-0340000051107-hypothetical	1.19e-15	0.409554	0.515	0.412	2.25e-11	WT	AMEXTC-0340000051107-hypothetical
AMEXTC-0340000065826-LOC108700425	4.27e-15	0.322402	0.094	0.017	8.1e-11	WT	AMEXTC-0340000065826-LOC108700425
mRNA00239	5.68e-14	0.211344	0.07	0.006	1.08e-09	WT	mRNA00239
AMEXTC-0340000064524-keratin	8.2e-14	0.346096	0.095	0.021	1.56e-09	WT	AMEXTC-0340000064524-keratin
AMEXTC-0340000288656-CAPG	8.64e-14	0.366992	0.156	0.064	1.64e-09	WT	AMEXTC-0340000288656-CAPG
AMEXTC-0340000164499-heat	1e-13	0.372662	0.281	0.173	1.9e-09	WT	AMEXTC-0340000164499-heat
AMEXTC-0340000053557-keratin	8.34e-13	0.274392	0.08	0.014	1.58e-08	WT	AMEXTC-0340000053557-keratin
AMEXTC-0340000060391-ncl.S	7.4e-12	0.37065	0.267	0.166	1.41e-07	WT	AMEXTC-0340000060391-ncl.S
AMEXTC-0340000055894-RPL4	1.64e-11	0.331659	0.392	0.291	3.11e-07	WT	AMEXTC-0340000055894-RPL4
AMEXTC-0340000128156-LOC102940625	7.32e-11	0.178828	0.077	0.018	1.39e-06	WT	AMEXTC-0340000128156-LOC102940625
AMEXTC-0340000193751-RPS18	7.97e-11	0.25157	0.204	0.115	1.51e-06	WT	AMEXTC-0340000193751-RPS18
AMEXTC-0340000067429-LOC110077729	8.34e-11	0.29227	0.094	0.03	1.58e-06	WT	AMEXTC-0340000067429-LOC110077729
AMEXTC-0340000140651-mvp.L	1.21e-10	0.296642	0.238	0.146	2.29e-06	WT	AMEXTC-0340000140651-mvp.L
AMEXTC-0340000025689-LOC109314240	7.61e-10	0.20347	0.065	0.013	1.45e-05	WT	AMEXTC-0340000025689-LOC109314240
AMEXTC-0340000147566-RPL13	2.09e-09	0.39875	0.527	0.47	3.98e-05	WT	AMEXTC-0340000147566-RPL13
AMEXTC-0340000066295-ferritin	2.4e-09	0.357344	0.302	0.215	4.55e-05	WT	AMEXTC-0340000066295-ferritin
AMEXTC-0340000061036-protein	3.11e-09	0.381617	0.538	0.484	5.91e-05	WT	AMEXTC-0340000061036-protein
AMEXTC-0340000281105-LOC101605408	9e-09	0.24071	0.138	0.07	0.000170935	WT	AMEXTC-0340000281105-LOC101605408
AMEXTC-0340000054181-arrdc2	1.74e-08	0.227554	0.099	0.041	0.000331237	WT	AMEXTC-0340000054181-arrdc2
AMEXTC-0340000030769-KLF2	4e-08	0.184185	0.094	0.038	0.000759564	WT	AMEXTC-0340000030769-KLF2
AMEXTC-0340000152570-gpa33.L	6.75e-08	0.259026	0.196	0.124	0.00128171	WT	AMEXTC-0340000152570-gpa33.L
AMEXTC-0340000135861-RPL13A	9.8e-08	0.29113	0.367	0.287	0.00186112	WT	AMEXTC-0340000135861-RPL13A
AMEXTC-0340000022955-thioredoxin	1.4e-07	0.172751	0.054	0.013	0.00265528	WT	AMEXTC-0340000022955-thioredoxin
AMEXTC-0340000250610-hypothetical	1.77e-07	0.349033	0.406	0.341	0.00336489	WT	AMEXTC-0340000250610-hypothetical
AMEXTC-0340000067721-RPS11	2.12e-07	0.240329	0.226	0.153	0.0040243	WT	AMEXTC-0340000067721-RPS11
AMEXTC-0340000122146-DDIT4	2.19e-07	0.155153	0.071	0.026	0.00415652	WT	AMEXTC-0340000122146-DDIT4
AMEXTC-0340000131392-LOC107084780	3.16e-07	0.313381	0.481	0.423	0.00600834	WT	AMEXTC-0340000131392-LOC107084780
AMEXTC-0340000013066-PTGS2	4.92e-07	0.193497	0.097	0.046	0.00933668	WT	AMEXTC-0340000013066-PTGS2
AMEXTC-0340000060912-DBF4B	6.08e-07	0.367835	0.532	0.493	0.0115492	WT	AMEXTC-0340000060912-DBF4B
AMEXTC-0340000053070-RPL10	2.03e-06	0.318586	0.376	0.313	0.0384915	WT	AMEXTC-0340000053070-RPL10
AMEXTC-0340000016847-thioredoxin	2.05e-06	0.104187	0.072	0.029	0.0388606	WT	AMEXTC-0340000016847-thioredoxin
AMEXTC-0340000065047-rplp0.L	2.26e-06	0.29005	0.341	0.279	0.0428451	WT	AMEXTC-0340000065047-rplp0.L
AMEXTC-0340000236818-TMBIM6	2.54e-06	0.162534	0.088	0.042	0.0482777	WT	AMEXTC-0340000236818-TMBIM6
AMEXTC-0340000148294-RACK1	2.68e-06	0.271377	0.41	0.344	0.050953	WT	AMEXTC-0340000148294-RACK1
AMEXTC-0340000033862-HSP90AB1	2.96e-06	0.335009	0.532	0.492	0.0562406	WT	AMEXTC-0340000033862-HSP90AB1
AMEXTC-0340000167467-ferritin	3.17e-06	0.388169	0.29	0.234	0.0602087	WT	AMEXTC-0340000167467-ferritin
AMEXTC-0340000070693-rps8	4.52e-06	0.102593	0.104	0.056	0.0859162	WT	AMEXTC-0340000070693-rps8
AMEXTC-0340000249940-rpl18.L	6.45e-06	0.237223	0.28	0.215	0.122451	WT	AMEXTC-0340000249940-rpl18.L
AMEXTC-0340000163059-SLC20A1	7.67e-06	0.189115	0.092	0.048	0.145602	WT	AMEXTC-0340000163059-SLC20A1
mRNA01206	7.76e-06	0.279771	0.337	0.273	0.147323	WT	mRNA01206
AMEXTC-0340000157709-LOC106904245	8.32e-06	0.324914	0.617	0.609	0.158018	WT	AMEXTC-0340000157709-LOC106904245
AMEXTC-0340000050223-DES	1.05e-05	0.158497	0.108	0.165	0.200233	WT	AMEXTC-0340000050223-DES
AMEXTC-0340000218837-LOC102933164	1.08e-05	0.245647	0.21	0.151	0.205654	WT	AMEXTC-0340000218837-LOC102933164
AMEXTC-0340000060653-LOC100917284	1.18e-05	0.164858	0.094	0.05	0.225025	WT	AMEXTC-0340000060653-LOC100917284
AMEXTC-0340000281118-glyceraldehyde	2.06e-05	0.24688	0.285	0.223	0.391009	WT	AMEXTC-0340000281118-glyceraldehyde
AMEXTC-0340000084303-Nsa2	2.34e-05	0.163768	0.095	0.052	0.44481	WT	AMEXTC-0340000084303-Nsa2
AMEXTC-0340000160430-LGALS3	2.42e-05	0.12821	0.065	0.029	0.459351	WT	AMEXTC-0340000160430-LGALS3
AMEXTC-0340000291869-idh2.L	2.65e-05	0.150717	0.109	0.064	0.503863	WT	AMEXTC-0340000291869-idh2.L
AMEXTC-0340000070788-rpsa.S	3.22e-05	0.151359	0.128	0.08	0.611398	WT	AMEXTC-0340000070788-rpsa.S
AMEXTC-0340000171595-ywhaq	3.43e-05	0.325393	0.478	0.443	0.651557	WT	AMEXTC-0340000171595-ywhaq
AMEXTC-0340000060158-fructose-bisphosphate	3.51e-05	0.10799	0.076	0.038	0.666678	WT	AMEXTC-0340000060158-fructose-bisphosphate
AMEXTC-0340000070861-RPL27A	5.83e-05	0.247773	0.264	0.207	1	WT	AMEXTC-0340000070861-RPL27A
AMEXTC-0340000218661-mCG129313	6.25e-05	0.102052	0.052	0.021	1	WT	AMEXTC-0340000218661-mCG129313
AMEXTC-0340000267509-NFKBIA	6.4e-05	0.255713	0.188	0.137	1	WT	AMEXTC-0340000267509-NFKBIA
AMEXTC-0340000064717-ahcy	6.78e-05	0.143421	0.091	0.051	1	WT	AMEXTC-0340000064717-ahcy
AMEXTC-0340000059501-RPL8	7.12e-05	0.264095	0.459	0.41	1	WT	AMEXTC-0340000059501-RPL8
AMEXTC-0340000129040-SRI	7.79e-05	0.188487	0.147	0.099	1	WT	AMEXTC-0340000129040-SRI
AMEXTC-0340000049484-rps27a	9.04e-05	0.275514	0.454	0.415	1	WT	AMEXTC-0340000049484-rps27a
AMEXTC-0340000139860-RPS6	9.8e-05	0.28981	0.491	0.453	1	WT	AMEXTC-0340000139860-RPS6
AMEXTC-0340000174773-rpl24	0.000126217	0.315061	0.315	0.271	1	WT	AMEXTC-0340000174773-rpl24
AMEXTC-0340000070910-LOC100337691	0.000131456	0.193003	0.254	0.201	1	WT	AMEXTC-0340000070910-LOC100337691
AMEXTC-0340000050527-eef1b2.L	0.000150116	0.197677	0.27	0.219	1	WT	AMEXTC-0340000050527-eef1b2.L
AMEXTC-0340000032707-rps24	0.000187606	0.124575	0.156	0.109	1	WT	AMEXTC-0340000032707-rps24
AMEXTC-0340000066291-tnni2.S	0.000193411	0.18406	0.296	0.243	1	WT	AMEXTC-0340000066291-tnni2.S
AMEXTC-0340000019360-LOC107302476	0.000229462	0.102317	0.06	0.03	1	WT	AMEXTC-0340000019360-LOC107302476
mRNA00488	0.00025009	0.114849	0.111	0.071	1	WT	mRNA00488
AMEXTC-0340000257028-eif3l	0.000357087	0.104707	0.058	0.029	1	WT	AMEXTC-0340000257028-eif3l
AMEXTC-0340000059242-DUSP1	0.000399089	0.257167	0.189	0.145	1	WT	AMEXTC-0340000059242-DUSP1
AMEXTC-0340000046713-PTX3	0.000438169	0.151117	0.067	0.037	1	WT	AMEXTC-0340000046713-PTX3
AMEXTC-0340000062113-SLC25A3	0.000454699	0.225071	0.276	0.227	1	WT	AMEXTC-0340000062113-SLC25A3
AMEXTC-0340000226440-SET	0.000468931	0.189511	0.219	0.171	1	WT	AMEXTC-0340000226440-SET
AMEXTC-0340000066526-RPL17	0.000485517	0.26008	0.31	0.265	1	WT	AMEXTC-0340000066526-RPL17
AMEXTC-0340000236745-rpl21	0.000515817	0.283197	0.338	0.297	1	WT	AMEXTC-0340000236745-rpl21
AMEXTC-0340000066413-EEF2	0.000545374	0.313828	0.381	0.347	1	WT	AMEXTC-0340000066413-EEF2
AMEXTC-0340000048324-LOC102698167	0.000732986	0.150967	0.156	0.115	1	WT	AMEXTC-0340000048324-LOC102698167
AMEXTC-0340000065596-UBC	0.000733332	0.2596	0.327	0.28	1	WT	AMEXTC-0340000065596-UBC
AMEXTC-0340000028461-nucleotide-binding	0.000963322	0.119725	0.063	0.036	1	WT	AMEXTC-0340000028461-nucleotide-binding
AMEXTC-0340000056568-LOC106731755	0.00104117	0.163454	0.403	0.358	1	WT	AMEXTC-0340000056568-LOC106731755
AMEXTC-0340000023342-RPL12	0.00126801	0.111622	0.204	0.158	1	WT	AMEXTC-0340000023342-RPL12
AMEXTC-0340000227228-hspa5	0.00133556	0.11574	0.068	0.04	1	WT	AMEXTC-0340000227228-hspa5
AMEXTC-0340000048009-reverse-2	0.00157998	0.163025	0.141	0.104	1	WT	AMEXTC-0340000048009-reverse-2
AMEXTC-0340000066447-LOC103234934	0.00172481	0.250326	0.448	0.418	1	WT	AMEXTC-0340000066447-LOC103234934
AMEXTC-0340000056997-HNRNPK	0.00184657	0.200046	0.201	0.162	1	WT	AMEXTC-0340000056997-HNRNPK
AMEXTC-0340000065363-EIF3M	0.00189328	0.105206	0.057	0.032	1	WT	AMEXTC-0340000065363-EIF3M
AMEXTC-0340000062072-RPS3	0.00310668	0.124528	0.222	0.181	1	WT	AMEXTC-0340000062072-RPS3
AMEXTC-0340000268759-RPL7	0.00329144	0.288151	0.401	0.378	1	WT	AMEXTC-0340000268759-RPL7
AMEXTC-0340000064581-nucleotide-binding	0.00331445	0.103521	0.117	0.084	1	WT	AMEXTC-0340000064581-nucleotide-binding
AMEXTC-0340000182972-RPL10A	0.00334186	0.235449	0.409	0.382	1	WT	AMEXTC-0340000182972-RPL10A
AMEXTC-0340000284702-influenza	0.00340121	0.133073	0.09	0.061	1	WT	AMEXTC-0340000284702-influenza
AMEXTC-0340000139919-RPL5	0.00399338	0.227247	0.296	0.259	1	WT	AMEXTC-0340000139919-RPL5
AMEXTC-0340000063717-PRDX5	0.00477695	0.10815	0.073	0.048	1	WT	AMEXTC-0340000063717-PRDX5
AMEXTC-0340000060732-LOC104484772	0.00484486	0.161898	0.062	0.039	1	WT	AMEXTC-0340000060732-LOC104484772
AMEXTC-0340000029609-EIF5A	0.00487145	0.271798	0.386	0.366	1	WT	AMEXTC-0340000029609-EIF5A
AMEXTC-0340000132661-TPM3	0.00508995	0.114904	0.079	0.052	1	WT	AMEXTC-0340000132661-TPM3
AMEXTC-0340000052377-voltage-dependent	0.00533644	0.176668	0.171	0.136	1	WT	AMEXTC-0340000052377-voltage-dependent
AMEXTC-0340000137289-ENO1	0.00583106	0.101981	0.1	0.071	1	WT	AMEXTC-0340000137289-ENO1
AMEXTC-0340000185882-ANXA1	0.00620122	0.106663	0.08	0.055	1	WT	AMEXTC-0340000185882-ANXA1
AMEXTC-0340000266533-RPL31	0.00703035	0.195257	0.3	0.269	1	WT	AMEXTC-0340000266533-RPL31
AMEXTC-0340000269387-LOC104061926	0.00779873	0.16988	0.27	0.234	1	WT	AMEXTC-0340000269387-LOC104061926
AMEXTC-0340000063642-Atp5b	0.00818843	0.170035	0.195	0.162	1	WT	AMEXTC-0340000063642-Atp5b
AMEXTC-0340000195029-RPL7A	0.00854799	0.263463	0.474	0.453	1	WT	AMEXTC-0340000195029-RPL7A
AMEXTC-0340000256853-SRSF7	0.00907528	0.112068	0.102	0.075	1	WT	AMEXTC-0340000256853-SRSF7

## Sheet: DEGs_Secretory_cells
	p_val	avg_log2FC	pct.1	pct.2	p_val_adj	cluster	gene
AMEXTC-0340000055421-cytoplasmic	0	0.404875	0.836	0.727	0	META	AMEXTC-0340000055421-cytoplasmic
AMEXTC-0340000056990-aquaporin	0	0.392223	0.216	0.111	0	META	AMEXTC-0340000056990-aquaporin
AMEXTC-0340000114746-lgals2	0	0.354192	0.455	0.324	0	META	AMEXTC-0340000114746-lgals2
AMEXTC-0340000227208-hypothetical	0	0.334045	0.362	0.239	0	META	AMEXTC-0340000227208-hypothetical
AMEXTC-0340000024264-chka.L	0	0.325465	0.229	0.091	0	META	AMEXTC-0340000024264-chka.L
AMEXTC-0340000059583-cytokeratin	0	0.319229	0.736	0.521	0	META	AMEXTC-0340000059583-cytokeratin
AMEXTC-0340000126189-LOC397772	0	0.30982	0.394	0.267	0	META	AMEXTC-0340000126189-LOC397772
AMEXTC-0340000267539-high	0	0.286707	0.233	0.106	0	META	AMEXTC-0340000267539-high
AMEXTC-0340000046733-LMNA	0	0.278153	0.235	0.115	0	META	AMEXTC-0340000046733-LMNA
AMEXTC-0340000135282-rps2	0	0.269827	0.668	0.522	0	META	AMEXTC-0340000135282-rps2
AMEXTC-0340000044450-glud1	0	0.244037	0.215	0.115	0	META	AMEXTC-0340000044450-glud1
AMEXTC-0340000142374-ppa2	0	0.239076	0.238	0.131	0	META	AMEXTC-0340000142374-ppa2
AMEXTC-0340000056568-LOC106731755	0	0.230263	0.519	0.389	0	META	AMEXTC-0340000056568-LOC106731755
AMEXTC-0340000269275-transgelin-2	0	0.205147	0.352	0.227	0	META	AMEXTC-0340000269275-transgelin-2
AMEXTC-0340000046035-CIRBP	0	0.195926	0.242	0.139	0	META	AMEXTC-0340000046035-CIRBP
AMEXTC-0340000275186-KRT18	0	0.184771	0.589	0.403	0	META	AMEXTC-0340000275186-KRT18
AMEXTC-0340000067103-annexin	0	0.177143	0.153	0.063	0	META	AMEXTC-0340000067103-annexin
AMEXTC-0340000040717-CMBL	0	0.143534	0.083	0.023	0	META	AMEXTC-0340000040717-CMBL
AMEXTC-0340000072918-LOC102456231	0	0.13676	0.127	0.051	0	META	AMEXTC-0340000072918-LOC102456231
AMEXTC-0340000035688-LOC108696199	0	0.131243	0.077	0.023	0	META	AMEXTC-0340000035688-LOC108696199
AMEXTC-0340000062173-Angiogenin	0	0.126413	0.059	0.008	0	META	AMEXTC-0340000062173-Angiogenin
AMEXTC-0340000122764-LOC101934772	5.24e-294	0.140145	0.102	0.04	9.96e-290	META	AMEXTC-0340000122764-LOC101934772
AMEXTC-0340000260737-upk1a.L	5.31e-289	0.145017	0.099	0.039	1.01e-284	META	AMEXTC-0340000260737-upk1a.L
AMEXTC-0340000039309-hypothetical	4.47e-284	0.191229	0.358	0.241	8.48e-280	META	AMEXTC-0340000039309-hypothetical
AMEXTC-0340000060391-ncl.S	9.68e-282	0.227239	0.433	0.314	1.84e-277	META	AMEXTC-0340000060391-ncl.S
AMEXTC-0340000202959-LOC100565496	8.87e-276	0.158005	0.265	0.162	1.69e-271	META	AMEXTC-0340000202959-LOC100565496
AMEXTC-0340000226440-SET	1.91e-274	0.208747	0.325	0.215	3.63e-270	META	AMEXTC-0340000226440-SET
AMEXTC-0340000040855-SFPQ	8.08e-262	0.155277	0.23	0.136	1.53e-257	META	AMEXTC-0340000040855-SFPQ
AMEXTC-0340000003731-LOC108791711	2.21e-253	0.166931	0.204	0.118	4.19e-249	META	AMEXTC-0340000003731-LOC108791711
AMEXTC-0340000053991-LOC104912428	1.62e-231	0.149622	0.158	0.085	3.08e-227	META	AMEXTC-0340000053991-LOC104912428
AMEXTC-0340000064581-nucleotide-binding	1.24e-228	0.151622	0.194	0.113	2.36e-224	META	AMEXTC-0340000064581-nucleotide-binding
AMEXTC-0340000185882-ANXA1	2.54e-227	0.376793	0.222	0.143	4.83e-223	META	AMEXTC-0340000185882-ANXA1
AMEXTC-0340000054658-rpl3	1.72e-223	0.193338	0.472	0.365	3.26e-219	META	AMEXTC-0340000054658-rpl3
AMEXTC-0340000048632-CCND1	4.02e-218	0.108699	0.129	0.065	7.63e-214	META	AMEXTC-0340000048632-CCND1
AMEXTC-0340000028470-hnrnpab	3.76e-217	0.18819	0.241	0.156	7.14e-213	META	AMEXTC-0340000028470-hnrnpab
AMEXTC-0340000170886-actg1.S	1.01e-216	0.143441	0.218	0.134	1.92e-212	META	AMEXTC-0340000170886-actg1.S
AMEXTC-0340000218837-LOC102933164	1.92e-209	0.176442	0.309	0.214	3.65e-205	META	AMEXTC-0340000218837-LOC102933164
AMEXTC-0340000238819-LOC103054879	3.29e-208	0.130856	0.137	0.073	6.25e-204	META	AMEXTC-0340000238819-LOC103054879
AMEXTC-0340000051753-SUGP2	1.47e-188	0.136198	0.228	0.148	2.79e-184	META	AMEXTC-0340000051753-SUGP2
AMEXTC-0340000066569-histone	7.43e-188	0.135416	0.227	0.146	1.41e-183	META	AMEXTC-0340000066569-histone
AMEXTC-0340000036308-hypothetical	1.94e-185	0.236889	0.219	0.141	3.68e-181	META	AMEXTC-0340000036308-hypothetical
AMEXTC-0340000197281-ALDH1A1	6.74e-185	0.124867	0.322	0.225	1.28e-180	META	AMEXTC-0340000197281-ALDH1A1
AMEXTC-0340000180106-NONO	2.41e-180	0.148275	0.241	0.161	4.58e-176	META	AMEXTC-0340000180106-NONO
AMEXTC-0340000288656-CAPG	3.68e-172	0.39704	0.242	0.172	6.98e-168	META	AMEXTC-0340000288656-CAPG
AMEXTC-0340000301473-npm1.L	2.57e-168	0.107191	0.156	0.093	4.87e-164	META	AMEXTC-0340000301473-npm1.L
AMEXTC-0340000281092-adh4	1.77e-163	0.21129	0.255	0.177	3.36e-159	META	AMEXTC-0340000281092-adh4
AMEXTC-0340000061995-RNA-binding	2.23e-162	0.137482	0.75	0.67	4.23e-158	META	AMEXTC-0340000061995-RNA-binding
AMEXTC-0340000238348-MYEF2	2.71e-158	0.110714	0.149	0.089	5.15e-154	META	AMEXTC-0340000238348-MYEF2
AMEXTC-0340000084588-CALM3	3.67e-153	0.11831	0.207	0.137	6.98e-149	META	AMEXTC-0340000084588-CALM3
AMEXTC-0340000054094-LSU	3.04e-151	0.11563	0.129	0.075	5.77e-147	META	AMEXTC-0340000054094-LSU
AMEXTC-0340000256858-SRSF9	2.57e-149	0.116888	0.152	0.093	4.89e-145	META	AMEXTC-0340000256858-SRSF9
AMEXTC-0340000049939-LOC106702273	5.23e-147	0.162045	0.154	0.096	9.93e-143	META	AMEXTC-0340000049939-LOC106702273
AMEXTC-0340000145853-lgals9c	2.53e-145	0.137778	0.222	0.15	4.81e-141	META	AMEXTC-0340000145853-lgals9c
AMEXTC-0340000014953-putative	1.15e-142	0.120231	0.387	0.3	2.19e-138	META	AMEXTC-0340000014953-putative
AMEXTC-0340000049996-epcam.S	3.79e-140	0.100468	0.152	0.094	7.2e-136	META	AMEXTC-0340000049996-epcam.S
AMEXTC-0340000056997-HNRNPK	7.21e-134	0.150827	0.3	0.225	1.37e-129	META	AMEXTC-0340000056997-HNRNPK
AMEXTC-0340000020700-SLC4A4	1.09e-130	0.101557	0.097	0.053	2.06e-126	META	AMEXTC-0340000020700-SLC4A4
AMEXTC-0340000003827-alpha-keratin	4.4e-122	0.249353	0.542	0.471	8.35e-118	META	AMEXTC-0340000003827-alpha-keratin
AMEXTC-0340000053511-LOC108788923	4.84e-118	0.100468	0.159	0.104	9.2e-114	META	AMEXTC-0340000053511-LOC108788923
AMEXTC-0340000125239-LSU	1.72e-114	0.133664	0.071	0.037	3.27e-110	META	AMEXTC-0340000125239-LSU
AMEXTC-0340000123296-LOC100494026	1.95e-113	0.117207	0.093	0.053	3.7e-109	META	AMEXTC-0340000123296-LOC100494026
AMEXTC-0340000222270-PEPD	2.37e-109	0.106512	0.127	0.08	4.49e-105	META	AMEXTC-0340000222270-PEPD
AMEXTC-0340000117228-LOC101391786	1.41e-101	0.105779	0.217	0.155	2.68e-97	META	AMEXTC-0340000117228-LOC101391786
AMEXTC-0340000125714-fos.L	5.01e-100	0.107666	0.226	0.166	9.51e-96	META	AMEXTC-0340000125714-fos.L
AMEXTC-0340000041456-complement	1.34e-99	0.128495	0.133	0.086	2.54e-95	META	AMEXTC-0340000041456-complement
AMEXTC-0340000050026-LOC110085547	1.59e-99	0.111862	0.165	0.114	3.02e-95	META	AMEXTC-0340000050026-LOC110085547
AMEXTC-0340000122671-Keratin	4.44e-80	0.328105	0.263	0.211	8.44e-76	META	AMEXTC-0340000122671-Keratin
AMEXTC-0340000003516-LOC108918784	4.35e-60	0.100974	0.115	0.081	8.27e-56	META	AMEXTC-0340000003516-LOC108918784
AMEXTC-0340000228467-tspan1	3.16e-35	0.115084	0.174	0.143	6.01e-31	META	AMEXTC-0340000228467-tspan1
AMEXTC-0340000045453-LOC102566338	0	2.3591	0.333	0.011	0	WT	AMEXTC-0340000045453-LOC102566338
AMEXTC-0340000053619-KRT4	0	1.81027	0.261	0.008	0	WT	AMEXTC-0340000053619-KRT4
AMEXTC-0340000015355-LOC104614514	0	1.73959	0.267	0.026	0	WT	AMEXTC-0340000015355-LOC104614514
mRNA00732	0	1.72357	0.088	0.008	0	WT	mRNA00732
AMEXTC-0340000123297-PRSS2	0	1.63182	0.085	0.01	0	WT	AMEXTC-0340000123297-PRSS2
AMEXTC-0340000117996-LOC108715072	0	1.55811	0.084	0.009	0	WT	AMEXTC-0340000117996-LOC108715072
AMEXTC-0340000002081-krt12.S	0	1.508	0.073	0.002	0	WT	AMEXTC-0340000002081-krt12.S
AMEXTC-0340000065537-Acrv1	0	1.48424	0.056	0	0	WT	AMEXTC-0340000065537-Acrv1
AMEXTC-0340000120583-CPA1	0	1.17456	0.079	0.008	0	WT	AMEXTC-0340000120583-CPA1
AMEXTC-0340000237445-zg16.S	0	1.07686	0.237	0.127	0	WT	AMEXTC-0340000237445-zg16.S
AMEXTC-0340000117570-ctrc.L	0	1.05079	0.079	0.008	0	WT	AMEXTC-0340000117570-ctrc.L
AMEXTC-0340000003048-LOC108696889	0	1.02648	0.149	0.06	0	WT	AMEXTC-0340000003048-LOC108696889
AMEXTC-0340000120582-chit1	0	1.01592	0.079	0.009	0	WT	AMEXTC-0340000120582-chit1
AMEXTC-0340000120584-CELA3B	0	0.932051	0.079	0.008	0	WT	AMEXTC-0340000120584-CELA3B
AMEXTC-0340000072888-T	0	0.855474	0.08	0.011	0	WT	AMEXTC-0340000072888-T
AMEXTC-0340000045623-LOC100127632	0	0.846538	0.108	0.01	0	WT	AMEXTC-0340000045623-LOC100127632
AMEXTC-0340000127668-chymotrypsin	0	0.845774	0.07	0.007	0	WT	AMEXTC-0340000127668-chymotrypsin
AMEXTC-0340000065510-LOC105862709	0	0.841699	0.252	0.13	0	WT	AMEXTC-0340000065510-LOC105862709
AMEXTC-0340000124572-LOC108789591	0	0.785766	0.077	0.007	0	WT	AMEXTC-0340000124572-LOC108789591
AMEXTC-0340000120581-LOC495520	0	0.727189	0.077	0.008	0	WT	AMEXTC-0340000120581-LOC495520
AMEXTC-0340000067538-antifreeze	0	0.724208	0.587	0.437	0	WT	AMEXTC-0340000067538-antifreeze
AMEXTC-0340000128130-LOC108715072	0	0.683853	0.073	0.007	0	WT	AMEXTC-0340000128130-LOC108715072
AMEXTC-0340000122336-ctrl	0	0.666544	0.073	0.007	0	WT	AMEXTC-0340000122336-ctrl
AMEXTC-0340000112994-cela1	0	0.647086	0.077	0.008	0	WT	AMEXTC-0340000112994-cela1
AMEXTC-0340000127649-Carboxypeptidase	0	0.645772	0.073	0.007	0	WT	AMEXTC-0340000127649-Carboxypeptidase
AMEXTC-0340000119996-LOC103033388	0	0.641971	0.075	0.007	0	WT	AMEXTC-0340000119996-LOC103033388
AMEXTC-0340000119123-LOC110368211	0	0.615177	0.069	0.007	0	WT	AMEXTC-0340000119123-LOC110368211
AMEXTC-0340000126143-LOC107197025	0	0.57795	0.073	0.007	0	WT	AMEXTC-0340000126143-LOC107197025
AMEXTC-0340000120585-LOC102934296	0	0.575919	0.071	0.007	0	WT	AMEXTC-0340000120585-LOC102934296
AMEXTC-0340000004091-LOC108803548	0	0.534515	0.16	0.044	0	WT	AMEXTC-0340000004091-LOC108803548
AMEXTC-0340000121299-LOC102460988	0	0.520168	0.071	0.007	0	WT	AMEXTC-0340000121299-LOC102460988
AMEXTC-0340000176076-LOC108793352	0	0.491931	0.168	0.066	0	WT	AMEXTC-0340000176076-LOC108793352
AMEXTC-0340000064524-keratin	0	0.342651	0.08	0.008	0	WT	AMEXTC-0340000064524-keratin
AMEXTC-0340000065826-LOC108700425	0	0.276849	0.076	0.007	0	WT	AMEXTC-0340000065826-LOC108700425
AMEXTC-0340000062861-LOC102446471	0	0.271475	0.068	0.002	0	WT	AMEXTC-0340000062861-LOC102446471
AMEXTC-0340000053557-keratin	7.69e-308	0.260866	0.066	0.006	1.46e-303	WT	AMEXTC-0340000053557-keratin
AMEXTC-0340000003772-LOC102348341	2.47e-305	0.36515	0.067	0.006	4.69e-301	WT	AMEXTC-0340000003772-LOC102348341
AMEXTC-0340000128615-LOC108803689	3.09e-301	0.534179	0.069	0.008	5.86e-297	WT	AMEXTC-0340000128615-LOC108803689
AMEXTC-0340000120750-chit1.S	6.95e-299	0.464856	0.067	0.007	1.32e-294	WT	AMEXTC-0340000120750-chit1.S
AMEXTC-0340000128124-LOC109303436	1.17e-295	0.312324	0.063	0.005	2.22e-291	WT	AMEXTC-0340000128124-LOC109303436
AMEXTC-0340000124783-RNA-directed	3.13e-287	0.300273	0.063	0.006	5.95e-283	WT	AMEXTC-0340000124783-RNA-directed
AMEXTC-0340000119104-LOC103271472	1.6e-280	0.223312	0.056	0.003	3.03e-276	WT	AMEXTC-0340000119104-LOC103271472
AMEXTC-0340000118106-PLA2G1B	1.57e-278	0.250177	0.057	0.004	2.98e-274	WT	AMEXTC-0340000118106-PLA2G1B
AMEXTC-0340000121692-prss1	3.03e-277	0.449993	0.066	0.008	5.76e-273	WT	AMEXTC-0340000121692-prss1
AMEXTC-0340000061107-LOC105922587	6.84e-273	0.233378	0.052	0.001	1.3e-268	WT	AMEXTC-0340000061107-LOC105922587
AMEXTC-0340000122104-prss1.L	1.41e-262	1.61932	0.091	0.026	2.67e-258	WT	AMEXTC-0340000122104-prss1.L
AMEXTC-0340000007397-CKMT1B	1.76e-253	0.150568	0.086	0.023	3.34e-249	WT	AMEXTC-0340000007397-CKMT1B
AMEXTC-0340000022797-bpifb2	1.63e-246	0.604299	0.064	0.01	3.1e-242	WT	AMEXTC-0340000022797-bpifb2
AMEXTC-0340000041497-LOC102348341	2.27e-237	0.78035	0.053	0.005	4.32e-233	WT	AMEXTC-0340000041497-LOC102348341
AMEXTC-0340000201223-IQCD	3.2e-234	0.345484	0.417	0.31	6.08e-230	WT	AMEXTC-0340000201223-IQCD
AMEXTC-0340000013004-LOC100491016	4.42e-231	0.287449	0.118	0.046	8.39e-227	WT	AMEXTC-0340000013004-LOC100491016
AMEXTC-0340000119402-LOC101942494	1.44e-223	0.182348	0.052	0.006	2.73e-219	WT	AMEXTC-0340000119402-LOC101942494
AMEXTC-0340000012285-APOA4	4.44e-218	0.767493	0.124	0.056	8.44e-214	WT	AMEXTC-0340000012285-APOA4
AMEXTC-0340000066291-tnni2.S	6.52e-194	0.275208	0.34	0.244	1.24e-189	WT	AMEXTC-0340000066291-tnni2.S
AMEXTC-0340000120294-LOC102565486	3.47e-190	0.138199	0.05	0.008	6.6e-186	WT	AMEXTC-0340000120294-LOC102565486
AMEXTC-0340000181501-apoa1.L	6.43e-190	0.298893	0.127	0.061	1.22e-185	WT	AMEXTC-0340000181501-apoa1.L
AMEXTC-0340000067429-LOC110077729	7.1e-189	0.222824	0.076	0.024	1.35e-184	WT	AMEXTC-0340000067429-LOC110077729
AMEXTC-0340000018337-SCD	1.28e-176	0.162238	0.066	0.019	2.42e-172	WT	AMEXTC-0340000018337-SCD
AMEXTC-0340000057237-Pebp1	2.81e-156	0.122651	0.073	0.026	5.35e-152	WT	AMEXTC-0340000057237-Pebp1
AMEXTC-0340000236745-rpl21	2.48e-124	0.193654	0.346	0.267	4.72e-120	WT	AMEXTC-0340000236745-rpl21
AMEXTC-0340000043349-ORF2	1.84e-120	0.108354	0.077	0.035	3.49e-116	WT	AMEXTC-0340000043349-ORF2
AMEXTC-0340000049619-MUC5AC	2.2e-120	0.468537	0.164	0.108	4.17e-116	WT	AMEXTC-0340000049619-MUC5AC
AMEXTC-0340000293224-prdx6.S	4.41e-116	0.271535	0.22	0.158	8.37e-112	WT	AMEXTC-0340000293224-prdx6.S
AMEXTC-0340000047114-LOC108713475	1.21e-115	0.574065	0.237	0.172	2.3e-111	WT	AMEXTC-0340000047114-LOC108713475
AMEXTC-0340000022844-AHNAK2	8e-105	0.133484	0.065	0.028	1.52e-100	WT	AMEXTC-0340000022844-AHNAK2
AMEXTC-0340000050539-pmp2.S	6.67e-101	0.103086	0.124	0.075	1.27e-96	WT	AMEXTC-0340000050539-pmp2.S
AMEXTC-0340000301887-LOC108922239	4.05e-99	0.887969	0.194	0.147	7.69e-95	WT	AMEXTC-0340000301887-LOC108922239
AMEXTC-0340000159010-LOC108704652	4.63e-98	0.670983	0.311	0.246	8.8e-94	WT	AMEXTC-0340000159010-LOC108704652
AMEXTC-0340000036435-hypothetical	4.44e-96	0.144001	0.061	0.028	8.43e-92	WT	AMEXTC-0340000036435-hypothetical
AMEXTC-0340000058281-LOC100127267.L	5.7e-96	0.154295	0.113	0.067	1.08e-91	WT	AMEXTC-0340000058281-LOC100127267.L
AMEXTC-0340000025182-LOC108786473	1.06e-92	0.128787	0.118	0.072	2.02e-88	WT	AMEXTC-0340000025182-LOC108786473
AMEXTC-0340000059814-ahcy.L	2.06e-90	0.123361	0.16	0.109	3.92e-86	WT	AMEXTC-0340000059814-ahcy.L
AMEXTC-0340000040950-ferritin	3.22e-87	0.326609	0.907	0.908	6.11e-83	WT	AMEXTC-0340000040950-ferritin
AMEXTC-0340000036491-faxdc2	5.84e-84	0.203354	0.143	0.098	1.11e-79	WT	AMEXTC-0340000036491-faxdc2
AMEXTC-0340000067123-ETHE1	7.73e-83	0.135616	0.134	0.089	1.47e-78	WT	AMEXTC-0340000067123-ETHE1
AMEXTC-0340000059748-LTA4H	7.17e-77	0.105241	0.139	0.094	1.36e-72	WT	AMEXTC-0340000059748-LTA4H
AMEXTC-0340000014104-CAPN8	2.36e-76	0.120536	0.078	0.044	4.48e-72	WT	AMEXTC-0340000014104-CAPN8
AMEXTC-0340000045508-MUC5B	1.25e-71	0.221261	0.103	0.066	2.38e-67	WT	AMEXTC-0340000045508-MUC5B
AMEXTC-0340000000577-GSN	6.69e-70	0.158443	0.173	0.126	1.27e-65	WT	AMEXTC-0340000000577-GSN
AMEXTC-0340000207067-rps5	2.24e-69	0.129352	0.351	0.292	4.26e-65	WT	AMEXTC-0340000207067-rps5
AMEXTC-0340000236909-CKB	1.09e-67	0.454442	0.321	0.272	2.06e-63	WT	AMEXTC-0340000236909-CKB
AMEXTC-0340000017499-APOB	1e-66	0.926603	0.18	0.144	1.91e-62	WT	AMEXTC-0340000017499-APOB
AMEXTC-0340000180104-dnah12	9.72e-65	0.10516	0.149	0.106	1.85e-60	WT	AMEXTC-0340000180104-dnah12
AMEXTC-0340000041451-ACE	3.26e-62	0.478604	0.168	0.131	6.19e-58	WT	AMEXTC-0340000041451-ACE
mRNA00239	1.66e-61	0.135916	0.163	0.12	3.15e-57	WT	mRNA00239
AMEXTC-0340000140651-mvp.L	2.95e-61	0.216879	0.435	0.398	5.61e-57	WT	AMEXTC-0340000140651-mvp.L
AMEXTC-0340000063129-hypothetical	7.53e-57	0.408645	0.124	0.171	1.43e-52	WT	AMEXTC-0340000063129-hypothetical
AMEXTC-0340000057623-ferritin	4.49e-54	0.198389	0.212	0.172	8.52e-50	WT	AMEXTC-0340000057623-ferritin
AMEXTC-0340000224715-ZG16	1.13e-50	0.563468	0.297	0.362	2.14e-46	WT	AMEXTC-0340000224715-ZG16
AMEXTC-0340000298294-hypothetical	1.83e-48	0.134741	0.08	0.053	3.47e-44	WT	AMEXTC-0340000298294-hypothetical
AMEXTC-0340000193751-RPS18	6.61e-47	0.126577	0.208	0.168	1.26e-42	WT	AMEXTC-0340000193751-RPS18
AMEXTC-0340000256839-hypothetical	2.37e-46	0.199067	0.356	0.318	4.5e-42	WT	AMEXTC-0340000256839-hypothetical
AMEXTC-0340000136394-LOC108708912	6.14e-45	0.59117	0.092	0.064	1.17e-40	WT	AMEXTC-0340000136394-LOC108708912
AMEXTC-0340000201873-LOC108786316	9.73e-45	0.481754	0.132	0.099	1.85e-40	WT	AMEXTC-0340000201873-LOC108786316
AMEXTC-0340000148410-pepsinogen	1.45e-42	0.44553	0.058	0.036	2.75e-38	WT	AMEXTC-0340000148410-pepsinogen
AMEXTC-0340000066295-ferritin	2.38e-35	0.215926	0.589	0.59	4.53e-31	WT	AMEXTC-0340000066295-ferritin
AMEXTC-0340000281118-glyceraldehyde	6.66e-30	0.151859	0.382	0.354	1.27e-25	WT	AMEXTC-0340000281118-glyceraldehyde
AMEXTC-0340000118921-LOC100490215	2.58e-28	0.114208	0.096	0.072	4.91e-24	WT	AMEXTC-0340000118921-LOC100490215
AMEXTC-0340000060528-ferritin	1.69e-27	0.103419	0.141	0.115	3.22e-23	WT	AMEXTC-0340000060528-ferritin
AMEXTC-0340000256869-LOC100494403	1.93e-26	0.124153	0.406	0.378	3.67e-22	WT	AMEXTC-0340000256869-LOC100494403
AMEXTC-0340000016904-LOC106038159	1.51e-25	0.13674	0.111	0.09	2.87e-21	WT	AMEXTC-0340000016904-LOC106038159
AMEXTC-0340000147566-RPL13	3.03e-25	0.16542	0.56	0.557	5.75e-21	WT	AMEXTC-0340000147566-RPL13
AMEXTC-0340000033050-hypothetical	1.65e-22	0.962665	0.306	0.309	3.14e-18	WT	AMEXTC-0340000033050-hypothetical
AMEXTC-0340000066520-LOC107292610	8.69e-17	0.109476	0.08	0.065	1.65e-12	WT	AMEXTC-0340000066520-LOC107292610
AMEXTC-0340000132553-SELENOP	2.31e-16	0.120474	0.25	0.23	4.39e-12	WT	AMEXTC-0340000132553-SELENOP
AMEXTC-0340000007982-LDHB	3.62e-14	0.14268	0.098	0.084	6.88e-10	WT	AMEXTC-0340000007982-LDHB
AMEXTC-0340000042008-GKN1	3.23e-12	0.248795	0.077	0.065	6.13e-08	WT	AMEXTC-0340000042008-GKN1
AMEXTC-0340000002622-LOC108795422	3.33e-09	0.10739	0.142	0.13	6.33e-05	WT	AMEXTC-0340000002622-LOC108795422
AMEXTC-0340000260799-LOC102933150	7.01e-08	0.640102	0.24	0.282	0.00133186	WT	AMEXTC-0340000260799-LOC102933150
AMEXTC-0340000116127-LOC108710314	4.8e-06	0.171897	0.129	0.144	0.0912163	WT	AMEXTC-0340000116127-LOC108710314
AMEXTC-0340000023242-collagen	6.75e-06	0.22015	0.072	0.064	0.128167	WT	AMEXTC-0340000023242-collagen
AMEXTC-0340000250610-hypothetical	0.00113246	0.101094	0.444	0.449	1	WT	AMEXTC-0340000250610-hypothetical

## Sheet: DEGs_Stromal_cells
	p_val	avg_log2FC	pct.1	pct.2	p_val_adj	cluster	gene
AMEXTC-0340000044071-FBN1	0	0.789011	0.432	0.268	0	META	AMEXTC-0340000044071-FBN1
AMEXTC-0340000049825-dcn	0	0.722755	0.584	0.407	0	META	AMEXTC-0340000049825-dcn
AMEXTC-0340000171041-LOC108708207	0	0.704198	0.153	0.03	0	META	AMEXTC-0340000171041-LOC108708207
AMEXTC-0340000279815-hypothetical	0	0.680746	0.728	0.814	0	META	AMEXTC-0340000279815-hypothetical
AMEXTC-0340000051589-COL11A1	0	0.489032	0.211	0.069	0	META	AMEXTC-0340000051589-COL11A1
AMEXTC-0340000197936-atp1a1.L	0	0.433932	0.132	0.047	0	META	AMEXTC-0340000197936-atp1a1.L
AMEXTC-0340000051609-CALB1	0	0.415408	0.076	0.002	0	META	AMEXTC-0340000051609-CALB1
AMEXTC-0340000063401-thrombospondin-4	0	0.402415	0.121	0.027	0	META	AMEXTC-0340000063401-thrombospondin-4
AMEXTC-0340000019271-LOC106674670	0	0.385806	0.347	0.203	0	META	AMEXTC-0340000019271-LOC106674670
AMEXTC-0340000016624-Angiogenin-2	0	0.371827	0.073	0	0	META	AMEXTC-0340000016624-Angiogenin-2
AMEXTC-0340000273753-ndrg1	0	0.354154	0.125	0.02	0	META	AMEXTC-0340000273753-ndrg1
AMEXTC-0340000024582-C1QTNF1	0	0.341791	0.153	0.026	0	META	AMEXTC-0340000024582-C1QTNF1
AMEXTC-0340000019121-tgfbi	0	0.33662	0.175	0.073	0	META	AMEXTC-0340000019121-tgfbi
AMEXTC-0340000002378-LOC108700220	0	0.324062	0.133	0.027	0	META	AMEXTC-0340000002378-LOC108700220
AMEXTC-0340000019594-atp1a1.L	0	0.3145	0.19	0.084	0	META	AMEXTC-0340000019594-atp1a1.L
AMEXTC-0340000028187-LOC110090180	0	0.282141	0.247	0.111	0	META	AMEXTC-0340000028187-LOC110090180
AMEXTC-0340000024264-chka.L	0	0.27932	0.135	0.041	0	META	AMEXTC-0340000024264-chka.L
AMEXTC-0340000010712-LSU	0	0.273806	0.148	0.064	0	META	AMEXTC-0340000010712-LSU
AMEXTC-0340000020700-SLC4A4	0	0.269362	0.056	0.005	0	META	AMEXTC-0340000020700-SLC4A4
AMEXTC-0340000059460-rhcg.L	0	0.244037	0.078	0.003	0	META	AMEXTC-0340000059460-rhcg.L
AMEXTC-0340000071836-beta-globin	0	0.226669	0.081	0.022	0	META	AMEXTC-0340000071836-beta-globin
AMEXTC-0340000084578-LOC106605384	0	0.224138	0.076	0.008	0	META	AMEXTC-0340000084578-LOC106605384
AMEXTC-0340000035688-LOC108696199	0	0.221637	0.076	0.002	0	META	AMEXTC-0340000035688-LOC108696199
AMEXTC-0340000149168-NDRG2	0	0.221367	0.174	0.062	0	META	AMEXTC-0340000149168-NDRG2
AMEXTC-0340000057775-FHL1	0	0.212762	0.196	0.091	0	META	AMEXTC-0340000057775-FHL1
AMEXTC-0340000042648-aspn.L	0	0.204588	0.097	0.022	0	META	AMEXTC-0340000042648-aspn.L
AMEXTC-0340000053511-LOC108788923	0	0.191192	0.08	0.005	0	META	AMEXTC-0340000053511-LOC108788923
AMEXTC-0340000060397-ABI3BP	0	0.188079	0.119	0.046	0	META	AMEXTC-0340000060397-ABI3BP
AMEXTC-0340000025182-LOC108786473	0	0.179552	0.052	0.006	0	META	AMEXTC-0340000025182-LOC108786473
AMEXTC-0340000016255-PRR5	0	0.17936	0.068	0.005	0	META	AMEXTC-0340000016255-PRR5
AMEXTC-0340000046328-CHAD	0	0.175078	0.071	0.007	0	META	AMEXTC-0340000046328-CHAD
AMEXTC-0340000030789-ANGPTL7	0	0.17505	0.068	0.01	0	META	AMEXTC-0340000030789-ANGPTL7
AMEXTC-0340000049246-CDH16	0	0.175025	0.061	0	0	META	AMEXTC-0340000049246-CDH16
AMEXTC-0340000018458-CILP2	0	0.170927	0.082	0.018	0	META	AMEXTC-0340000018458-CILP2
AMEXTC-0340000050539-pmp2.S	0	0.165283	0.077	0.022	0	META	AMEXTC-0340000050539-pmp2.S
AMEXTC-0340000050910-FAM188B	0	0.162961	0.082	0.019	0	META	AMEXTC-0340000050910-FAM188B
AMEXTC-0340000063759-EMP1	0	0.156017	0.108	0.039	0	META	AMEXTC-0340000063759-EMP1
AMEXTC-0340000012215-TFCP2L1	0	0.148378	0.08	0.02	0	META	AMEXTC-0340000012215-TFCP2L1
AMEXTC-0340000039968-HSD17B13	0	0.146802	0.07	0.003	0	META	AMEXTC-0340000039968-HSD17B13
AMEXTC-0340000214667-FBXL18	0	0.125778	0.094	0.032	0	META	AMEXTC-0340000214667-FBXL18
AMEXTC-0340000228467-tspan1	0	0.123555	0.053	0.005	0	META	AMEXTC-0340000228467-tspan1
AMEXTC-0340000210083-OXCT1	0	0.117914	0.068	0.015	0	META	AMEXTC-0340000210083-OXCT1
AMEXTC-0340000014404-NRP1	0	0.113307	0.07	0.02	0	META	AMEXTC-0340000014404-NRP1
AMEXTC-0340000009730-CTHRC1	0	0.11226	0.094	0.027	0	META	AMEXTC-0340000009730-CTHRC1
AMEXTC-0340000176178-CHP1	1.15e-303	0.110557	0.059	0.015	2.19e-299	META	AMEXTC-0340000176178-CHP1
AMEXTC-0340000016847-thioredoxin	2.34e-287	0.140138	0.068	0.02	4.44e-283	META	AMEXTC-0340000016847-thioredoxin
AMEXTC-0340000236909-CKB	1.32e-285	0.362605	0.136	0.065	2.5e-281	META	AMEXTC-0340000236909-CKB
AMEXTC-0340000145853-lgals9c	4.11e-284	0.132879	0.072	0.023	7.8e-280	META	AMEXTC-0340000145853-lgals9c
AMEXTC-0340000291869-idh2.L	1.5e-269	0.266684	0.184	0.103	2.85e-265	META	AMEXTC-0340000291869-idh2.L
AMEXTC-0340000137798-major	9.14e-265	0.183428	0.072	0.024	1.74e-260	META	AMEXTC-0340000137798-major
AMEXTC-0340000023242-collagen	5.45e-263	0.642351	0.735	0.852	1.04e-258	META	AMEXTC-0340000023242-collagen
mRNA01119	1.74e-261	0.13924	0.079	0.028	3.31e-257	META	mRNA01119
AMEXTC-0340000012916-CLU	8.19e-251	0.201957	0.156	0.082	1.56e-246	META	AMEXTC-0340000012916-CLU
AMEXTC-0340000047511-col6a3	2.27e-244	0.42063	0.495	0.404	4.31e-240	META	AMEXTC-0340000047511-col6a3
AMEXTC-0340000123284-pdgfrl	2.14e-224	0.107351	0.107	0.049	4.07e-220	META	AMEXTC-0340000123284-pdgfrl
AMEXTC-0340000063642-Atp5b	3.04e-224	0.231146	0.24	0.154	5.77e-220	META	AMEXTC-0340000063642-Atp5b
AMEXTC-0340000066990-MDH2	2.73e-223	0.115494	0.098	0.044	5.19e-219	META	AMEXTC-0340000066990-MDH2
AMEXTC-0340000060694-MDH1	1.72e-220	0.117502	0.095	0.042	3.26e-216	META	AMEXTC-0340000060694-MDH1
AMEXTC-0340000117374-acta2	9.81e-218	0.158568	0.062	0.022	1.86e-213	META	AMEXTC-0340000117374-acta2
AMEXTC-0340000045250-col4a2.S	8.12e-204	0.217541	0.187	0.113	1.54e-199	META	AMEXTC-0340000045250-col4a2.S
AMEXTC-0340000136670-atp5f1	1.06e-203	0.110449	0.103	0.049	2.02e-199	META	AMEXTC-0340000136670-atp5f1
AMEXTC-0340000031493-OGN	5.86e-193	0.210093	0.288	0.199	1.11e-188	META	AMEXTC-0340000031493-OGN
AMEXTC-0340000016719-alpha1	2.95e-191	0.273475	0.108	0.054	5.59e-187	META	AMEXTC-0340000016719-alpha1
AMEXTC-0340000055782-serpinf1	1.72e-183	0.125964	0.203	0.127	3.28e-179	META	AMEXTC-0340000055782-serpinf1
AMEXTC-0340000018024-MFAP5	5.37e-182	0.450638	0.315	0.237	1.02e-177	META	AMEXTC-0340000018024-MFAP5
AMEXTC-0340000006533-LOC104635427	2.86e-169	0.219951	0.449	0.363	5.44e-165	META	AMEXTC-0340000006533-LOC104635427
AMEXTC-0340000004704-TAGLN	2.89e-158	0.121905	0.061	0.025	5.49e-154	META	AMEXTC-0340000004704-TAGLN
mRNA00035	9.26e-156	0.500717	0.263	0.192	1.76e-151	META	mRNA00035
AMEXTC-0340000288656-CAPG	3.46e-149	0.110396	0.131	0.076	6.57e-145	META	AMEXTC-0340000288656-CAPG
AMEXTC-0340000167467-ferritin	1.03e-143	0.213247	0.297	0.222	1.95e-139	META	AMEXTC-0340000167467-ferritin
AMEXTC-0340000062113-SLC25A3	1.46e-141	0.232465	0.301	0.227	2.78e-137	META	AMEXTC-0340000062113-SLC25A3
AMEXTC-0340000070102-beta	1.27e-139	0.128866	0.059	0.025	2.42e-135	META	AMEXTC-0340000070102-beta
AMEXTC-0340000248307-LAMA2	1.62e-139	0.105663	0.092	0.049	3.08e-135	META	AMEXTC-0340000248307-LAMA2
AMEXTC-0340000008387-sparc.S	6.33e-123	0.280278	0.707	0.752	1.2e-118	META	AMEXTC-0340000008387-sparc.S
AMEXTC-0340000005605-SULF2	2.81e-115	0.102001	0.095	0.054	5.34e-111	META	AMEXTC-0340000005605-SULF2
AMEXTC-0340000122671-Keratin	2.22e-112	0.151388	0.097	0.056	4.21e-108	META	AMEXTC-0340000122671-Keratin
AMEXTC-0340000069295-minor	6.24e-112	0.107064	0.055	0.025	1.19e-107	META	AMEXTC-0340000069295-minor
AMEXTC-0340000246688-LOC104635543	6.1e-108	0.226302	0.473	0.407	1.16e-103	META	AMEXTC-0340000246688-LOC104635543
AMEXTC-0340000042814-COL5A2	8.9e-104	0.130737	0.547	0.481	1.69e-99	META	AMEXTC-0340000042814-COL5A2
AMEXTC-0340000269387-LOC104061926	5.71e-102	0.167813	0.293	0.23	1.09e-97	META	AMEXTC-0340000269387-LOC104061926
AMEXTC-0340000014615-FN1	6.4e-95	0.124011	0.145	0.098	1.22e-90	META	AMEXTC-0340000014615-FN1
AMEXTC-0340000060301-VIM	3.71e-92	0.201215	0.475	0.57	7.04e-88	META	AMEXTC-0340000060301-VIM
AMEXTC-0340000067538-antifreeze	0.00113415	0.301001	0.372	0.388	1	META	AMEXTC-0340000067538-antifreeze
AMEXTC-0340000034061-POSTN	0	1.45081	0.354	0.19	0	WT	AMEXTC-0340000034061-POSTN
AMEXTC-0340000046713-PTX3	0	1.44715	0.304	0.051	0	WT	AMEXTC-0340000046713-PTX3
AMEXTC-0340000025689-LOC109314240	0	1.12568	0.298	0.065	0	WT	AMEXTC-0340000025689-LOC109314240
AMEXTC-0340000045453-LOC102566338	0	1.01983	0.349	0.019	0	WT	AMEXTC-0340000045453-LOC102566338
AMEXTC-0340000063538-LOC102946426	0	0.763611	0.303	0.182	0	WT	AMEXTC-0340000063538-LOC102946426
AMEXTC-0340000030858-LOC102944312	0	0.751427	0.236	0.103	0	WT	AMEXTC-0340000030858-LOC102944312
AMEXTC-0340000015355-LOC104614514	0	0.714158	0.248	0.017	0	WT	AMEXTC-0340000015355-LOC104614514
AMEXTC-0340000035899-crispld2.S	0	0.654203	0.193	0.058	0	WT	AMEXTC-0340000035899-crispld2.S
AMEXTC-0340000053619-KRT4	0	0.627474	0.231	0.01	0	WT	AMEXTC-0340000053619-KRT4
AMEXTC-0340000021479-col12a1	0	0.612026	0.312	0.189	0	WT	AMEXTC-0340000021479-col12a1
AMEXTC-0340000050145-SERPINE1	0	0.565327	0.171	0.045	0	WT	AMEXTC-0340000050145-SERPINE1
AMEXTC-0340000060437-LOC100555387	0	0.525354	0.237	0.111	0	WT	AMEXTC-0340000060437-LOC100555387
AMEXTC-0340000242856-ucp2	0	0.499987	0.14	0.025	0	WT	AMEXTC-0340000242856-ucp2
AMEXTC-0340000281092-adh4	0	0.496689	0.341	0.192	0	WT	AMEXTC-0340000281092-adh4
AMEXTC-0340000250166-RHOB	0	0.490904	0.187	0.071	0	WT	AMEXTC-0340000250166-RHOB
AMEXTC-0340000059978-EEF1A1	0	0.459016	0.914	0.849	0	WT	AMEXTC-0340000059978-EEF1A1
AMEXTC-0340000040950-ferritin	0	0.416525	0.811	0.685	0	WT	AMEXTC-0340000040950-ferritin
AMEXTC-0340000059747-HIF3A	0	0.413564	0.176	0.083	0	WT	AMEXTC-0340000059747-HIF3A
AMEXTC-0340000204604-c2.L	0	0.384178	0.124	0.035	0	WT	AMEXTC-0340000204604-c2.L
AMEXTC-0340000293224-prdx6.S	0	0.361737	0.144	0.049	0	WT	AMEXTC-0340000293224-prdx6.S
AMEXTC-0340000119775-LOC101397869	0	0.359887	0.169	0.073	0	WT	AMEXTC-0340000119775-LOC101397869
AMEXTC-0340000290800-pcolce.L	0	0.324617	0.178	0.082	0	WT	AMEXTC-0340000290800-pcolce.L
AMEXTC-0340000058382-SPOCK3	0	0.252652	0.068	0.007	0	WT	AMEXTC-0340000058382-SPOCK3
AMEXTC-0340000045125-glul	0	0.241486	0.083	0.017	0	WT	AMEXTC-0340000045125-glul
AMEXTC-0340000047127-ADAMTS4	0	0.240056	0.083	0.017	0	WT	AMEXTC-0340000047127-ADAMTS4
AMEXTC-0340000010741-EMILIN2	0	0.231107	0.094	0.024	0	WT	AMEXTC-0340000010741-EMILIN2
AMEXTC-0340000062486-LGALS3BP	0	0.209133	0.097	0.023	0	WT	AMEXTC-0340000062486-LGALS3BP
AMEXTC-0340000052801-pah	0	0.208965	0.069	0.003	0	WT	AMEXTC-0340000052801-pah
AMEXTC-0340000196671-LOC102362757	0	0.192758	0.07	0.009	0	WT	AMEXTC-0340000196671-LOC102362757
AMEXTC-0340000022062-CLEC3B	1.43e-304	0.189678	0.082	0.017	2.71e-300	WT	AMEXTC-0340000022062-CLEC3B
AMEXTC-0340000061995-RNA-binding	3.96e-303	0.416016	0.612	0.511	7.53e-299	WT	AMEXTC-0340000061995-RNA-binding
AMEXTC-0340000233495-SQSTM1	5.98e-285	0.247567	0.105	0.034	1.14e-280	WT	AMEXTC-0340000233495-SQSTM1
AMEXTC-0340000021794-connexin	6.07e-278	0.177488	0.069	0.012	1.15e-273	WT	AMEXTC-0340000021794-connexin
AMEXTC-0340000157709-LOC106904245	9.94e-263	0.406194	0.534	0.45	1.89e-258	WT	AMEXTC-0340000157709-LOC106904245
AMEXTC-0340000044247-LOC104371679	1.15e-261	0.448493	0.231	0.137	2.18e-257	WT	AMEXTC-0340000044247-LOC104371679
AMEXTC-0340000041346-Gfpt2	7.66e-260	0.206379	0.076	0.018	1.46e-255	WT	AMEXTC-0340000041346-Gfpt2
AMEXTC-0340000034460-hgd	4.21e-243	0.158898	0.066	0.014	8e-239	WT	AMEXTC-0340000034460-hgd
AMEXTC-0340000059242-DUSP1	1.17e-238	0.514777	0.279	0.19	2.22e-234	WT	AMEXTC-0340000059242-DUSP1
AMEXTC-0340000124041-complement	3.14e-234	0.268999	0.09	0.03	5.96e-230	WT	AMEXTC-0340000124041-complement
AMEXTC-0340000236745-rpl21	2.52e-228	0.309295	0.297	0.202	4.78e-224	WT	AMEXTC-0340000236745-rpl21
AMEXTC-0340000023604-FBLN1	9.7e-215	0.245305	0.107	0.044	1.84e-210	WT	AMEXTC-0340000023604-FBLN1
AMEXTC-0340000051786-QDPR	6.17e-213	0.151979	0.07	0.019	1.17e-208	WT	AMEXTC-0340000051786-QDPR
AMEXTC-0340000062252-BTG1	2.22e-211	0.309193	0.163	0.088	4.21e-207	WT	AMEXTC-0340000062252-BTG1
AMEXTC-0340000031604-Ethanolamine-phosphate	3.68e-209	0.193695	0.065	0.017	6.99e-205	WT	AMEXTC-0340000031604-Ethanolamine-phosphate
AMEXTC-0340000052851-APCDD1	8.32e-204	0.121551	0.052	0.009	1.58e-199	WT	AMEXTC-0340000052851-APCDD1
AMEXTC-0340000070693-rps8	2.12e-203	0.11647	0.091	0.034	4.03e-199	WT	AMEXTC-0340000070693-rps8
AMEXTC-0340000122146-DDIT4	6.07e-197	0.25492	0.114	0.052	1.15e-192	WT	AMEXTC-0340000122146-DDIT4
AMEXTC-0340000062686-LOC109317542	1.19e-192	0.166651	0.095	0.038	2.26e-188	WT	AMEXTC-0340000062686-LOC109317542
AMEXTC-0340000000577-GSN	7.81e-187	0.310804	0.219	0.141	1.48e-182	WT	AMEXTC-0340000000577-GSN
AMEXTC-0340000155499-ferritin	2.13e-179	0.174608	0.092	0.038	4.04e-175	WT	AMEXTC-0340000155499-ferritin
AMEXTC-0340000060989-mmp19.L	4.55e-177	0.160984	0.056	0.015	8.65e-173	WT	AMEXTC-0340000060989-mmp19.L
AMEXTC-0340000018570-THBS2	2.83e-169	0.303081	0.176	0.107	5.37e-165	WT	AMEXTC-0340000018570-THBS2
AMEXTC-0340000045148-ALAS1	8.53e-168	0.426276	0.1	0.047	1.62e-163	WT	AMEXTC-0340000045148-ALAS1
AMEXTC-0340000055894-RPL4	3.5e-163	0.296924	0.357	0.279	6.65e-159	WT	AMEXTC-0340000055894-RPL4
AMEXTC-0340000051107-hypothetical	3.81e-162	0.312431	0.475	0.407	7.24e-158	WT	AMEXTC-0340000051107-hypothetical
AMEXTC-0340000056568-LOC106731755	9.67e-156	0.239787	0.422	0.341	1.84e-151	WT	AMEXTC-0340000056568-LOC106731755
AMEXTC-0340000055421-cytoplasmic	1.05e-154	0.306983	0.782	0.762	1.99e-150	WT	AMEXTC-0340000055421-cytoplasmic
AMEXTC-0340000053074-PDK4	1.25e-152	0.135569	0.058	0.019	2.37e-148	WT	AMEXTC-0340000053074-PDK4
AMEXTC-0340000281129-RASL11B	3.52e-149	0.153609	0.064	0.023	6.69e-145	WT	AMEXTC-0340000281129-RASL11B
AMEXTC-0340000021455-CEBPD	2.42e-142	0.260551	0.17	0.107	4.6e-138	WT	AMEXTC-0340000021455-CEBPD
AMEXTC-0340000031667-COL4A6	3.15e-142	0.190708	0.061	0.022	5.98e-138	WT	AMEXTC-0340000031667-COL4A6
AMEXTC-0340000147566-RPL13	3.37e-136	0.319054	0.471	0.412	6.41e-132	WT	AMEXTC-0340000147566-RPL13
AMEXTC-0340000218837-LOC102933164	1.39e-132	0.259021	0.269	0.198	2.64e-128	WT	AMEXTC-0340000218837-LOC102933164
AMEXTC-0340000054892-hypothetical	1.01e-129	0.193291	0.11	0.059	1.91e-125	WT	AMEXTC-0340000054892-hypothetical
AMEXTC-0340000135861-RPL13A	1.74e-125	0.252989	0.318	0.25	3.3e-121	WT	AMEXTC-0340000135861-RPL13A
AMEXTC-0340000227252-rpsa.S	2.87e-124	0.2514	0.335	0.266	5.45e-120	WT	AMEXTC-0340000227252-rpsa.S
AMEXTC-0340000204279-LOC108790145	3.04e-120	0.214561	0.098	0.052	5.78e-116	WT	AMEXTC-0340000204279-LOC108790145
AMEXTC-0340000148294-RACK1	1.4e-119	0.271987	0.39	0.327	2.65e-115	WT	AMEXTC-0340000148294-RACK1
AMEXTC-0340000039804-synapse	5.05e-119	0.251	0.241	0.176	9.6e-115	WT	AMEXTC-0340000039804-synapse
AMEXTC-0340000277529-LOC102362582	9.32e-118	0.179149	0.102	0.056	1.77e-113	WT	AMEXTC-0340000277529-LOC102362582
AMEXTC-0340000218103-LRP1	1.35e-117	0.162185	0.096	0.051	2.56e-113	WT	AMEXTC-0340000218103-LRP1
AMEXTC-0340000117753-BHMT	7.83e-116	0.233256	0.216	0.155	1.49e-111	WT	AMEXTC-0340000117753-BHMT
AMEXTC-0340000062704-PRMT1	1.24e-115	0.189999	0.151	0.097	2.35e-111	WT	AMEXTC-0340000062704-PRMT1
AMEXTC-0340000159671-CISH	1.88e-114	0.110735	0.051	0.018	3.56e-110	WT	AMEXTC-0340000159671-CISH
AMEXTC-0340000064511-MARCKS	1.24e-112	0.21636	0.176	0.119	2.35e-108	WT	AMEXTC-0340000064511-MARCKS
AMEXTC-0340000020850-EFEMP2	2.55e-112	0.165415	0.098	0.053	4.84e-108	WT	AMEXTC-0340000020850-EFEMP2
AMEXTC-0340000039935-FBN3	8.01e-109	0.183565	0.122	0.074	1.52e-104	WT	AMEXTC-0340000039935-FBN3
AMEXTC-0340000230218-FCN3	1.75e-108	0.11548	0.062	0.027	3.33e-104	WT	AMEXTC-0340000230218-FCN3
mRNA00488	6.7e-107	0.138784	0.125	0.076	1.27e-102	WT	mRNA00488
AMEXTC-0340000163059-SLC20A1	9.31e-104	0.206514	0.102	0.059	1.77e-99	WT	AMEXTC-0340000163059-SLC20A1
AMEXTC-0340000029132-LOC108698570	6.4e-102	0.116331	0.062	0.028	1.22e-97	WT	AMEXTC-0340000029132-LOC108698570
AMEXTC-0340000039800-LOC494636	1.23e-101	0.307027	0.329	0.271	2.35e-97	WT	AMEXTC-0340000039800-LOC494636
AMEXTC-0340000260356-NAP1L1	1.65e-101	0.22676	0.233	0.175	3.14e-97	WT	AMEXTC-0340000260356-NAP1L1
AMEXTC-0340000033451-ABCA1	3.02e-101	0.111717	0.061	0.027	5.74e-97	WT	AMEXTC-0340000033451-ABCA1
AMEXTC-0340000131392-LOC107084780	3.35e-99	0.278252	0.436	0.383	6.37e-95	WT	AMEXTC-0340000131392-LOC107084780
AMEXTC-0340000002264-CCNL2	3.45e-96	0.123311	0.065	0.032	6.56e-92	WT	AMEXTC-0340000002264-CCNL2
AMEXTC-0340000273780-FAH	3.51e-94	0.121211	0.069	0.035	6.67e-90	WT	AMEXTC-0340000273780-FAH
AMEXTC-0340000060912-DBF4B	1.13e-92	0.348793	0.468	0.435	2.14e-88	WT	AMEXTC-0340000060912-DBF4B
AMEXTC-0340000021736-OLFML2A	2.17e-86	0.112943	0.055	0.025	4.12e-82	WT	AMEXTC-0340000021736-OLFML2A
AMEXTC-0340000056997-HNRNPK	2.55e-86	0.226769	0.2	0.149	4.83e-82	WT	AMEXTC-0340000056997-HNRNPK
AMEXTC-0340000005722-adamts1	4.96e-85	0.167747	0.095	0.057	9.41e-81	WT	AMEXTC-0340000005722-adamts1
AMEXTC-0340000233355-ZFP36L2	4.8e-83	0.156201	0.09	0.054	9.12e-79	WT	AMEXTC-0340000233355-ZFP36L2
AMEXTC-0340000018602-LOC104614833	5.64e-83	0.101185	0.055	0.026	1.07e-78	WT	AMEXTC-0340000018602-LOC104614833
AMEXTC-0340000006345-F5	3.21e-81	0.136271	0.066	0.034	6.09e-77	WT	AMEXTC-0340000006345-F5
AMEXTC-0340000002589-PROS1	9.24e-80	0.105639	0.068	0.037	1.75e-75	WT	AMEXTC-0340000002589-PROS1
AMEXTC-0340000016655-SPON1	1.59e-76	0.127271	0.075	0.043	3.02e-72	WT	AMEXTC-0340000016655-SPON1
AMEXTC-0340000175976-nucleotide-binding	4.74e-76	0.215638	0.169	0.125	9.01e-72	WT	AMEXTC-0340000175976-nucleotide-binding
AMEXTC-0340000260404-txnip	2.66e-74	0.204037	0.155	0.112	5.05e-70	WT	AMEXTC-0340000260404-txnip
AMEXTC-0340000256807-myeloid	8.39e-73	0.187811	0.142	0.101	1.59e-68	WT	AMEXTC-0340000256807-myeloid
AMEXTC-0340000060653-LOC100917284	1.2e-72	0.160896	0.089	0.055	2.29e-68	WT	AMEXTC-0340000060653-LOC100917284
AMEXTC-0340000028461-nucleotide-binding	1.54e-72	0.124048	0.069	0.039	2.92e-68	WT	AMEXTC-0340000028461-nucleotide-binding
AMEXTC-0340000049484-rps27a	2.8e-72	0.238295	0.401	0.357	5.33e-68	WT	AMEXTC-0340000049484-rps27a
AMEXTC-0340000061036-protein	6.01e-72	0.294799	0.48	0.455	1.14e-67	WT	AMEXTC-0340000061036-protein
AMEXTC-0340000221079-xicl	7.33e-72	0.219862	0.147	0.106	1.39e-67	WT	AMEXTC-0340000221079-xicl
AMEXTC-0340000054181-arrdc2	1.98e-71	0.183747	0.123	0.084	3.75e-67	WT	AMEXTC-0340000054181-arrdc2
AMEXTC-0340000055751-LOC108789125	5.79e-70	0.101686	0.073	0.042	1.1e-65	WT	AMEXTC-0340000055751-LOC108789125
AMEXTC-0340000065047-rplp0.L	1.34e-68	0.237934	0.299	0.254	2.55e-64	WT	AMEXTC-0340000065047-rplp0.L
AMEXTC-0340000067522-Rps16-ps2	3.54e-68	0.207737	0.19	0.147	6.72e-64	WT	AMEXTC-0340000067522-Rps16-ps2
AMEXTC-0340000066295-ferritin	1.76e-66	0.198387	0.299	0.247	3.35e-62	WT	AMEXTC-0340000066295-ferritin
AMEXTC-0340000036622-MKNK2	1.43e-64	0.100686	0.057	0.031	2.72e-60	WT	AMEXTC-0340000036622-MKNK2
AMEXTC-0340000005367-CMTM5	1.03e-63	0.102473	0.073	0.044	1.96e-59	WT	AMEXTC-0340000005367-CMTM5
AMEXTC-0340000250610-hypothetical	6.1e-63	0.239798	0.362	0.321	1.16e-58	WT	AMEXTC-0340000250610-hypothetical
AMEXTC-0340000022394-TNFAIP6	1.23e-58	0.104215	0.071	0.043	2.34e-54	WT	AMEXTC-0340000022394-TNFAIP6
AMEXTC-0340000029609-EIF5A	7.87e-58	0.273475	0.354	0.32	1.5e-53	WT	AMEXTC-0340000029609-EIF5A
AMEXTC-0340000030769-KLF2	2.08e-56	0.226247	0.112	0.079	3.95e-52	WT	AMEXTC-0340000030769-KLF2
AMEXTC-0340000041456-complement	2.18e-54	0.26546	0.071	0.044	4.14e-50	WT	AMEXTC-0340000041456-complement
AMEXTC-0340000193751-RPS18	9.28e-54	0.133359	0.15	0.113	1.76e-49	WT	AMEXTC-0340000193751-RPS18
AMEXTC-0340000207707-thrombospondin-1	1.02e-53	0.165393	0.142	0.107	1.93e-49	WT	AMEXTC-0340000207707-thrombospondin-1
AMEXTC-0340000023726-FHL2	1.95e-53	0.125592	0.098	0.067	3.7e-49	WT	AMEXTC-0340000023726-FHL2
AMEXTC-0340000013066-PTGS2	3.94e-53	0.201141	0.112	0.08	7.49e-49	WT	AMEXTC-0340000013066-PTGS2
AMEXTC-0340000035200-SFRP2	4.85e-53	0.101972	0.06	0.035	9.21e-49	WT	AMEXTC-0340000035200-SFRP2
AMEXTC-0340000067197-rps28p9	4e-52	0.210626	0.208	0.171	7.6e-48	WT	AMEXTC-0340000067197-rps28p9
AMEXTC-0340000190175-COL16A1	7.8e-52	0.135359	0.121	0.089	1.48e-47	WT	AMEXTC-0340000190175-COL16A1
AMEXTC-0340000067649-60S	1.68e-51	0.1607	0.204	0.164	3.2e-47	WT	AMEXTC-0340000067649-60S
AMEXTC-0340000269275-transgelin-2	4.52e-50	0.208204	0.255	0.217	8.59e-46	WT	AMEXTC-0340000269275-transgelin-2
AMEXTC-0340000140651-mvp.L	1.4e-49	0.177005	0.202	0.164	2.65e-45	WT	AMEXTC-0340000140651-mvp.L
AMEXTC-0340000066526-RPL17	4.49e-49	0.24039	0.269	0.233	8.53e-45	WT	AMEXTC-0340000066526-RPL17
AMEXTC-0340000060391-ncl.S	9.8e-49	0.205104	0.241	0.203	1.86e-44	WT	AMEXTC-0340000060391-ncl.S
AMEXTC-0340000059501-RPL8	1.16e-48	0.25156	0.443	0.419	2.2e-44	WT	AMEXTC-0340000059501-RPL8
AMEXTC-0340000039309-hypothetical	1.34e-48	0.128235	0.28	0.238	2.54e-44	WT	AMEXTC-0340000039309-hypothetical
AMEXTC-0340000226440-SET	1.67e-48	0.165255	0.206	0.168	3.17e-44	WT	AMEXTC-0340000226440-SET
AMEXTC-0340000138910-myh9	1.91e-48	0.107921	0.112	0.081	3.64e-44	WT	AMEXTC-0340000138910-myh9
AMEXTC-0340000128156-LOC102940625	2.39e-48	0.354577	0.118	0.086	4.54e-44	WT	AMEXTC-0340000128156-LOC102940625
AMEXTC-0340000050527-eef1b2.L	3.35e-48	0.147603	0.271	0.231	6.36e-44	WT	AMEXTC-0340000050527-eef1b2.L
AMEXTC-0340000183167-emp3	1.19e-47	0.122897	0.076	0.051	2.25e-43	WT	AMEXTC-0340000183167-emp3
AMEXTC-0340000129040-SRI	1.47e-46	0.144712	0.159	0.125	2.8e-42	WT	AMEXTC-0340000129040-SRI
AMEXTC-0340000068025-RBP4	2.27e-46	0.197044	0.127	0.096	4.32e-42	WT	AMEXTC-0340000068025-RBP4
AMEXTC-0340000195029-RPL7A	1.33e-45	0.230373	0.429	0.402	2.53e-41	WT	AMEXTC-0340000195029-RPL7A
AMEXTC-0340000250550-Cd81	4.27e-45	0.136545	0.147	0.114	8.12e-41	WT	AMEXTC-0340000250550-Cd81
AMEXTC-0340000139919-RPL5	5.65e-45	0.211193	0.279	0.245	1.07e-40	WT	AMEXTC-0340000139919-RPL5
AMEXTC-0340000061860-CAT	1.31e-44	0.180093	0.219	0.183	2.48e-40	WT	AMEXTC-0340000061860-CAT
AMEXTC-0340000033751-olfml3	3.13e-44	0.151071	0.181	0.146	5.94e-40	WT	AMEXTC-0340000033751-olfml3
AMEXTC-0340000005238-LOC100486063	3.39e-44	0.136564	0.095	0.068	6.43e-40	WT	AMEXTC-0340000005238-LOC100486063
AMEXTC-0340000067657-RPL22	1.01e-43	0.17197	0.158	0.125	1.92e-39	WT	AMEXTC-0340000067657-RPL22
AMEXTC-0340000014829-HNRNPU	2.32e-43	0.132459	0.114	0.085	4.41e-39	WT	AMEXTC-0340000014829-HNRNPU
AMEXTC-0340000067195-LOC106904245	1.06e-42	0.134225	0.132	0.101	2.02e-38	WT	AMEXTC-0340000067195-LOC106904245
AMEXTC-0340000064290-zfp36l1	2.68e-40	0.116411	0.092	0.066	5.1e-36	WT	AMEXTC-0340000064290-zfp36l1
AMEXTC-0340000067721-RPS11	4.42e-40	0.132089	0.188	0.154	8.4e-36	WT	AMEXTC-0340000067721-RPS11
AMEXTC-0340000032782-tnc	2.68e-36	0.126051	0.105	0.079	5.09e-32	WT	AMEXTC-0340000032782-tnc
AMEXTC-0340000066447-LOC103234934	9.92e-36	0.196687	0.395	0.368	1.88e-31	WT	AMEXTC-0340000066447-LOC103234934
AMEXTC-0340000048324-LOC102698167	1.77e-35	0.134832	0.132	0.105	3.36e-31	WT	AMEXTC-0340000048324-LOC102698167
AMEXTC-0340000266533-RPL31	7.8e-35	0.130675	0.251	0.216	1.48e-30	WT	AMEXTC-0340000266533-RPL31
AMEXTC-0340000232945-tuba1a.L	2.31e-34	0.164949	0.172	0.143	4.4e-30	WT	AMEXTC-0340000232945-tuba1a.L
AMEXTC-0340000222640-APH1A	7.01e-34	0.195663	0.364	0.338	1.33e-29	WT	AMEXTC-0340000222640-APH1A
AMEXTC-0340000037855-pcbp3	7.83e-32	0.210053	0.246	0.219	1.49e-27	WT	AMEXTC-0340000037855-pcbp3
AMEXTC-0340000065596-UBC	2.81e-31	0.259235	0.341	0.321	5.33e-27	WT	AMEXTC-0340000065596-UBC
AMEXTC-0340000126210-early	3.19e-31	0.176083	0.14	0.115	6.05e-27	WT	AMEXTC-0340000126210-early
AMEXTC-0340000062072-RPS3	8.46e-31	0.110179	0.208	0.177	1.61e-26	WT	AMEXTC-0340000062072-RPS3
AMEXTC-0340000173995-CALD1	5.22e-30	0.124759	0.124	0.1	9.92e-26	WT	AMEXTC-0340000173995-CALD1
AMEXTC-0340000046231-MFAP2	9.34e-30	0.144867	0.138	0.113	1.77e-25	WT	AMEXTC-0340000046231-MFAP2
AMEXTC-0340000182895-RPS3A	8.67e-28	0.150444	0.247	0.221	1.65e-23	WT	AMEXTC-0340000182895-RPS3A
AMEXTC-0340000057334-cathepsin	2.09e-27	0.110283	0.093	0.072	3.98e-23	WT	AMEXTC-0340000057334-cathepsin
AMEXTC-0340000249940-rpl18.L	5.52e-27	0.138847	0.233	0.205	1.05e-22	WT	AMEXTC-0340000249940-rpl18.L
AMEXTC-0340000012433-hypothetical	9.62e-27	0.116658	0.159	0.134	1.83e-22	WT	AMEXTC-0340000012433-hypothetical
AMEXTC-0340000182972-RPL10A	2.79e-25	0.21079	0.347	0.329	5.3e-21	WT	AMEXTC-0340000182972-RPL10A
AMEXTC-0340000067496-RPS23	4.55e-25	0.208847	0.25	0.228	8.63e-21	WT	AMEXTC-0340000067496-RPS23
AMEXTC-0340000260799-LOC102933150	5.32e-23	0.154631	0.117	0.095	1.01e-18	WT	AMEXTC-0340000260799-LOC102933150
AMEXTC-0340000048009-reverse-2	1.36e-21	0.132336	0.155	0.134	2.59e-17	WT	AMEXTC-0340000048009-reverse-2
AMEXTC-0340000267509-NFKBIA	6.65e-21	0.129952	0.199	0.175	1.26e-16	WT	AMEXTC-0340000267509-NFKBIA
AMEXTC-0340000032501-RPL23	2.63e-20	0.172586	0.257	0.236	5e-16	WT	AMEXTC-0340000032501-RPL23
AMEXTC-0340000139860-RPS6	1.08e-19	0.211559	0.419	0.411	2.05e-15	WT	AMEXTC-0340000139860-RPS6
AMEXTC-0340000070910-LOC100337691	3.69e-19	0.101238	0.21	0.187	7e-15	WT	AMEXTC-0340000070910-LOC100337691
AMEXTC-0340000057623-ferritin	2.83e-18	0.112048	0.092	0.075	5.38e-14	WT	AMEXTC-0340000057623-ferritin
AMEXTC-0340000268759-RPL7	5.78e-17	0.182537	0.349	0.338	1.1e-12	WT	AMEXTC-0340000268759-RPL7
AMEXTC-0340000149167-rps15	8.34e-16	0.109452	0.154	0.136	1.58e-11	WT	AMEXTC-0340000149167-rps15
AMEXTC-0340000147850-FKBP10	1.3e-14	0.121417	0.169	0.153	2.47e-10	WT	AMEXTC-0340000147850-FKBP10
AMEXTC-0340000067981-RPL6	3.79e-14	0.15805	0.298	0.284	7.21e-10	WT	AMEXTC-0340000067981-RPL6
AMEXTC-0340000017630-zgc:153867	5.61e-14	0.128571	0.187	0.171	1.07e-09	WT	AMEXTC-0340000017630-zgc:153867
AMEXTC-0340000260738-EIF3F	8.45e-14	0.11328	0.124	0.109	1.6e-09	WT	AMEXTC-0340000260738-EIF3F
AMEXTC-0340000171595-ywhaq	2.64e-13	0.16525	0.414	0.408	5.02e-09	WT	AMEXTC-0340000171595-ywhaq
AMEXTC-0340000058084-ITM2A	2.71e-12	0.160051	0.205	0.191	5.15e-08	WT	AMEXTC-0340000058084-ITM2A
AMEXTC-0340000144213-LAMB1	4.4e-12	0.117067	0.173	0.157	8.35e-08	WT	AMEXTC-0340000144213-LAMB1
AMEXTC-0340000256869-LOC100494403	6.11e-12	0.125638	0.293	0.279	1.16e-07	WT	AMEXTC-0340000256869-LOC100494403
AMEXTC-0340000227208-hypothetical	1.09e-11	0.107009	0.168	0.152	2.07e-07	WT	AMEXTC-0340000227208-hypothetical
AMEXTC-0340000053070-RPL10	3.73e-11	0.144882	0.32	0.31	7.08e-07	WT	AMEXTC-0340000053070-RPL10
AMEXTC-0340000202959-LOC100565496	9.02e-10	0.137733	0.178	0.166	1.71e-05	WT	AMEXTC-0340000202959-LOC100565496
AMEXTC-0340000050083-LOC444845	9.1e-10	0.115815	0.175	0.162	1.73e-05	WT	AMEXTC-0340000050083-LOC444845
AMEXTC-0340000115276-RPL26L1	2.75e-09	0.104696	0.137	0.124	5.23e-05	WT	AMEXTC-0340000115276-RPL26L1
AMEXTC-0340000037784-fkbp9.L	5.67e-09	0.113984	0.134	0.122	0.000107758	WT	AMEXTC-0340000037784-fkbp9.L
AMEXTC-0340000152570-gpa33.L	6.64e-09	0.133384	0.185	0.174	0.000126108	WT	AMEXTC-0340000152570-gpa33.L
AMEXTC-0340000174773-rpl24	1.75e-08	0.155647	0.259	0.249	0.000333185	WT	AMEXTC-0340000174773-rpl24
AMEXTC-0340000059583-cytokeratin	5.07e-08	0.297993	0.328	0.379	0.000963652	WT	AMEXTC-0340000059583-cytokeratin
AMEXTC-0340000062036-BGN	1.18e-07	0.130606	0.406	0.397	0.0022377	WT	AMEXTC-0340000062036-BGN
AMEXTC-0340000033862-HSP90AB1	1.47e-07	0.160095	0.465	0.469	0.00279711	WT	AMEXTC-0340000033862-HSP90AB1
AMEXTC-0340000067483-LOC106589173	2.75e-07	0.137451	0.24	0.231	0.00523266	WT	AMEXTC-0340000067483-LOC106589173
AMEXTC-0340000066413-EEF2	3.57e-06	0.189667	0.324	0.326	0.0677321	WT	AMEXTC-0340000066413-EEF2
AMEXTC-0340000070861-RPL27A	2.03e-05	0.106177	0.233	0.225	0.38473	WT	AMEXTC-0340000070861-RPL27A
AMEXTC-0340000257024-cysteine-rich	5.79e-05	0.131456	0.121	0.115	1	WT	AMEXTC-0340000257024-cysteine-rich
AMEXTC-0340000179322-TPT1	0.001314	0.172455	0.316	0.35	1	WT	AMEXTC-0340000179322-TPT1
AMEXTC-0340000275186-KRT18	0.00212772	0.167744	0.248	0.271	1	WT	AMEXTC-0340000275186-KRT18
mRNA01206	0.00718719	0.109719	0.25	0.248	1	WT	mRNA01206
